# Supplementary material for: In-depth proteomic characterization of Schistosoma haematobium: towards the development of new tools for elimination
Source: bioRxiv preprint, doi:10.1101/486662, version 1 (2018-12-10)
Supplement: Supplementary file 6 [file 486662_file14.xlsx]

## Sheet: 0
	Main Accession	Description	Gene Name	Chromosome	MW [kDa]	Possible Coverage [%]	Coverage [%]	Spectrum Counting	Confidently Localized Modification Sites	# Confidently Localized Modification Sites	Ambiguously Localized Modification Sites	#Ambiguously Localized Modification Sites	Protein Inference	Secondary Accessions	Protein Group	#Validated Peptides	#Peptides	#Unique	#Validated Unique	#Unique to Group	#Validated Unique to Group	#Validated PSMs	#PSMs	Confidence [%]	Validation
277	MS3_03973.1				32.9564	71.71	32.89	2474.03	Deamidation of N(N38, N41, N49, N53, N59, N84, N86); Deamidation of Q(Q62)	Deamidation of N(7); Deamidation of Q(1)			Single Protein		MS3_03973.1	30	37	37	30	37	30	2752	2905	100	Confident
271	Sh-TSP2-2008				23.8745	38.81	29.22	1694.01			Deamidation of Q (Q140-{Q140 Q141})	Deamidation of Q (1)	Single Protein		Sh-TSP2-2008	16	19	19	16	19	16	576	645	100	Confident
1084	MS3_04307.1				14.8624	100	52.63	1598.28	Oxidation of M(M20)	Oxidation of M(1)			Single Protein		MS3_04307.1	9	13	13	9	13	9	677	707	100	Confident
94	MS3_08446.1				22.6063	86.32	35.79	1594.18	Deamidation of Q(Q112); Oxidation of M(M107)	Deamidation of Q(1); Oxidation of M(1)			Single Protein		MS3_08446.1	11	24	24	11	24	11	1095	1269	100	Confident
473	MS3_11229.1				6.9087	100	49.18	1259.63	Deamidation of Q(Q30)	Deamidation of Q(1)			Single Protein		MS3_11229.1	3	4	4	3	4	3	154	160	100	Confident
340	MS3_09780.1				6.18925	100	62.71	1045.32					Single Protein		MS3_09780.1	4	5	5	4	5	4	168	173	100	Confident
1020	MS3_05757.1				7.74481	38.57	21.43	938.833					Single Protein		MS3_05757.1	3	6	6	3	6	3	44	50	100	Confident
53	MS3_06298.1				10.9332	100	35.11	867.984					Single Protein		MS3_06298.1	4	11	11	4	11	4	133	148	100	Confident
777	MS3_07454.1				14.4701	55.65	18.55	729.171					Single Protein		MS3_07454.1	4	8	8	4	8	4	182	215	100	Confident
491	MS3_02162.1				13.4671	71.93	47.37	727.555					Single Protein		MS3_02162.1	6	8	8	6	8	6	269	306	100	Confident
765	MS3_09812.1				11.5747	100	29	712.7	Deamidation of N(N45, N71)	Deamidation of N(2)			Single Protein		MS3_09812.1	5	10	10	5	10	5	125	137	100	Confident
102	MS3_05958.1				21.726	83.7	35.87	703.572	Deamidation of Q(Q55)	Deamidation of Q(1)			Single Protein		MS3_05958.1	13	23	22	12	23	13	560	630	100	Confident
243	MS3_01840.1				12.9171	76.79	45.54	687.397	Deamidation of N(N61); Deamidation of Q(Q66)	Deamidation of N(1); Deamidation of Q(1)			Single Protein		MS3_01840.1	11	12	12	11	12	11	228	249	100	Confident
613	MS3_02136.1				21.3404	78.89	50.25	654.284	Deamidation of Q(Q30)	Deamidation of Q(1)	Deamidation of N (N120-{N120 N123})	Deamidation of N (1)	Single Protein		MS3_02136.1	13	24	24	13	24	13	305	350	100	Confident
455	MS3_00996.1				23.9634	100	60.58	624.954	Oxidation of M(M55)	Oxidation of M(1)	Deamidation of Q (Q67-{N63 N65 Q67})	Deamidation of Q (1)	Single Protein		MS3_00996.1	24	37	37	24	37	24	778	917	100	Confident
256	MS3_08723.1				37.4509	90.03	58.91	620.214	Deamidation of Q(Q207)	Deamidation of Q(1)	Deamidation of Q (Q169-{Q169 N171})	Deamidation of Q (1)	Single Protein		MS3_08723.1	34	51	50	33	50	33	725	859	100	Confident
794	MS3_07467.1				10.4564	100	39.58	618.86					Single Protein		MS3_07467.1	3	6	6	3	6	3	140	147	100	Confident
853	MS3_03206.1				32.7742	84.77	38.08	606.048	Deamidation of N(N152); Oxidation of M(M47)	Deamidation of N(1); Oxidation of M(1)			Single Protein		MS3_03206.1	15	26	26	15	26	15	523	622	100	Confident
400	MS3_10736.1				21.1238	100	63.68	597.164	Deamidation of N(N137, N163); Deamidation of Q(Q131); Oxidation of M(M79, M84)	Deamidation of N(2); Deamidation of Q(1); Oxidation of M(2)			Single Protein		MS3_10736.1	17	28	28	17	28	17	358	425	100	Confident
840	MS3_05952.1				20.6396	100	72.38	574.318	Oxidation of M(M1, M72)	Oxidation of M(2)			Single Protein		MS3_05952.1	18	25	25	18	25	18	601	648	100	Confident
16	MS3_05959.1				20.8817	83.52	50	511.584					Single Protein		MS3_05959.1	9	14	13	8	14	9	262	325	100	Confident
975	MS3_04285.1				17.6766	79.5	19.88	496.856					Single Protein		MS3_04285.1	3	8	8	3	8	3	104	123	100	Confident
546	MS3_11293.1				30.2487	90.18	64.73	484.573	Deamidation of N(N3)	Deamidation of N(1)			Single Protein		MS3_11293.1	18	26	21	15	21	15	807	862	100	Confident
416	MS3_05924.1				10.7733	63.83	40.43	479.999	Deamidation of N(N12)	Deamidation of N(1)			Single Protein		MS3_05924.1	4	4	4	4	4	4	47	51	100	Confident
274	MS3_06482.1				23.8825	100	44.55	468.644	Deamidation of N(N129, N191)	Deamidation of N(2)			Single Protein		MS3_06482.1	11	21	21	11	21	11	455	482	100	Confident
955	MS3_05999.1				29.3704	88.1	49.07	457.125	Deamidation of N(N161); Oxidation of M(M174)	Deamidation of N(1); Oxidation of M(1)			Single Protein		MS3_05999.1	14	22	22	14	22	14	410	441	100	Confident
69	MS3_03655.1				32.6911	38.91	21.84	440.001					Single Protein		MS3_03655.1	9	12	12	9	12	9	167	180	100	Confident
931	MS3_04778.1				17.7279	100	51.19	432.913	Deamidation of N(N27, N115)	Deamidation of N(2)			Single Protein		MS3_04778.1	12	17	17	12	17	12	304	326	100	Confident
690	MS3_03977.1				28.3199	89.29	49.6	432.46	Deamidation of N(N53); Oxidation of M(M228)	Deamidation of N(1); Oxidation of M(1)			Single Protein		MS3_03977.1	15	21	8	5	8	5	687	830	100	Confident
893	MS3_11537.1				22.3412	73.17	64.88	425.876	Deamidation of N(N33); Deamidation of Q(Q37)	Deamidation of N(1); Deamidation of Q(1)			Single Protein		MS3_11537.1	18	21	21	18	21	18	336	375	100	Confident
55	MS3_02314.1				48.3807	76.15	44.95	420.919	Deamidation of N(N201); Deamidation of Q(Q70); Oxidation of M(M362)	Deamidation of N(1); Deamidation of Q(1); Oxidation of M(1)	Deamidation of Q (Q343-{N341 Q343})	Deamidation of Q (1)	Single Protein		MS3_02314.1	21	30	14	11	23	17	791	847	100	Confident
1031	MS3_02856.1				39.5905	84.3	74.66	412.078	Deamidation of N(N360); Deamidation of Q(Q307)	Deamidation of N(1); Deamidation of Q(1)	Deamidation of N (N73-{N73 Q86})	Deamidation of N (1)	Single Protein		MS3_02856.1	36	56	56	36	56	36	1014	1165	100	Confident
512	MS3_01096.1				17.9181	62.5	40	406.129					Single Protein		MS3_01096.1	6	10	9	5	9	5	133	141	100	Confident
481	MS3_07473.1				23.3299	33.02	13.49	405.5					Single Protein		MS3_07473.1	3	3	3	3	3	3	68	70	100	Confident
153	MS3_05345.1				10.4652	100	74.16	393.456					Single Protein		MS3_05345.1	15	18	16	14	18	15	99	104	100	Confident
407	MS3_01082.1				8.31719	100	36	389.28					Single Protein		MS3_01082.1	2	2	2	2	2	2	58	58	100	Confident
810	MS3_03301.1				21.0581	72.45	23.98	384.869					Single Protein		MS3_03301.1	5	10	10	5	10	5	195	218	100	Confident
387	MS3_08460.1				20.9157	82.7	47.57	379.658	Deamidation of Q(Q137)	Deamidation of Q(1)			Related Proteins	MS3_11122.1	MS3_08460.1, MS3_11122.1	10	14	13	9	13	9	262	291	100	Confident
463	MS3_02545.1				57.0974	35.44	11.3	377.96	Deamidation of Q(Q229, Q264)	Deamidation of Q(2)			Single Protein		MS3_02545.1	9	13	13	9	13	9	306	339	100	Confident
573	MS3_11411.1				40.7258	84.45	54.42	369.719	Deamidation of N(N89, N98, N217)	Deamidation of N(3)			Single Protein		MS3_11411.1	25	39	39	25	39	25	628	680	100	Confident
378	MS3_09198.1				23.6091	30.28	19.72	361.367					Single Protein		MS3_09198.1	3	6	6	3	6	3	105	120	100	Confident
687	MS3_05034.1				25.7982	88.79	56.47	345.614	Deamidation of Q(Q117); Oxidation of M(M78)	Deamidation of Q(1); Oxidation of M(1)			Single Protein		MS3_05034.1	14	24	24	14	24	14	320	377	100	Confident
408	MS3_10509.1				7.8306	100	68.12	323.416	Deamidation of Q(Q43)	Deamidation of Q(1)			Single Protein		MS3_10509.1	6	6	6	6	6	6	53	73	100	Confident
155	MS3_10753.1				20.3847	85.87	58.7	319.877	Deamidation of Q(Q65)	Deamidation of Q(1)			Single Protein		MS3_10753.1	10	12	12	10	12	10	186	190	100	Confident
367	MS3_01337.1				19.4069	35.84	14.45	310.285					Single Protein		MS3_01337.1	3	4	4	3	4	3	34	35	100	Confident
441	MS3_07594.1				26.9546	61.98	38.84	305.019			Deamidation of N (N53-{N53 N57})	Deamidation of N (1)	Single Protein		MS3_07594.1	9	16	16	9	16	9	218	287	100	Confident
492	MS3_09175.1				34.0098	30.6	16.72	293.262					Single Protein		MS3_09175.1	5	8	8	5	8	5	119	130	100	Confident
918	MS3_10141.1				36.5556	92.01	76.04	283.962	Deamidation of N(N9, N150, N226, N290, N305); Deamidation of Q(Q57, Q186); Oxidation of M(M131, M145, M176, M204, M332)	Deamidation of N(5); Deamidation of Q(2); Oxidation of M(5)			Related Proteins	MS3_11369.1	MS3_10141.1, MS3_11369.1	41	58	58	41	58	41	1240	1520	100	Confident
907	MS3_10315.1				8.33637	58.33	72.22	282.593					Single Protein		MS3_10315.1	6	6	6	6	6	6	55	58	100	Confident
514	MS3_04355.1				16.5892	65.31	29.25	269.216			Deamidation of N (N109-{N107 N109 Q111 Q112})	Deamidation of N (1)	Single Protein		MS3_04355.1	7	14	14	7	14	7	126	140	100	Confident
958	MS3_06348.1				22.5632	67.34	35.18	268.985					Single Protein		MS3_06348.1	7	9	9	7	9	7	78	85	100	Confident
380	MS3_01934.1				31.4209	43.93	18.93	268.342					Single Protein		MS3_01934.1	5	9	9	5	9	5	121	134	100	Confident
798	MS3_08366.1				20.6808	100	40.31	264.722	Deamidation of N(N133); Oxidation of M(M78)	Deamidation of N(1); Oxidation of M(1)			Single Protein		MS3_08366.1	10	16	16	10	16	10	154	177	100	Confident
228	MS3_02086.1				12.0382	100	52.78	261.382	Deamidation of N(N38)	Deamidation of N(1)	Deamidation of N (N65-{N65 Q67 N75})	Deamidation of N (1)	Single Protein		MS3_02086.1	8	11	11	8	11	8	117	124	100	Confident
497	MS3_02425.1				46.6848	94.01	69.35	260.818	Deamidation of N(N154, N161); Oxidation of M(M145)	Deamidation of N(2); Oxidation of M(1)	Deamidation of N (N68-{N68 N70 Q79})	Deamidation of N (1)	Single Protein		MS3_02425.1	37	46	46	37	46	37	960	1234	100	Confident
550	MS3_10701.1				10.4983	73.68	54.74	258.726			Deamidation of N (N35-{N35 Q36 N39 N41})	Deamidation of N (1)	Single Protein		MS3_10701.1	5	12	12	5	12	5	74	83	100	Confident
20	MS3_05216.1				11.3659	100	59.41	256.017	Deamidation of N(N55)	Deamidation of N(1)			Single Protein		MS3_05216.1	6	8	8	6	8	6	65	67	100	Confident
715	MS3_10085.1				11.8172	100	60.38	255.791					Single Protein		MS3_10085.1	6	7	7	6	7	6	122	124	100	Confident
230	MS3_00047.1				27.6488	100	55.23	253.121	Deamidation of N(N43); Oxidation of M(M33, M122, M211)	Deamidation of N(1); Oxidation of M(3)			Single Protein		MS3_00047.1	16	22	18	12	18	12	585	668	100	Confident
373	MS3_10998.1				16.9335	100	41.61	243.42	Oxidation of M(M87)	Oxidation of M(1)	Deamidation of Q (Q134-{N128 Q134 Q138})	Deamidation of Q (1)	Single Protein		MS3_10998.1	8	15	15	8	15	8	117	139	100	Confident
676	MS3_00180.1				19.9277	85.06	54.6	241.191	Oxidation of M(M1)	Oxidation of M(1)			Single Protein		MS3_00180.1	7	8	8	7	8	7	88	94	100	Confident
888	MS3_05245.1				18.3065	29.94	20.36	235.379			Deamidation of N (N135-{N135 N144 N146 Q148})	Deamidation of N (1)	Single Protein		MS3_05245.1	3	4	4	3	4	3	22	23	100	Confident
1066	MS3_02486.1				35.4007	89	51.67	235.235	Deamidation of N(N274); Deamidation of Q(Q219)	Deamidation of N(1); Deamidation of Q(1)			Single Protein		MS3_02486.1	25	37	37	25	37	25	404	485	100	Confident
119	MS3_10510.1				32.7511	68.44	59.14	234.345	Deamidation of Q(Q35)	Deamidation of Q(1)	Deamidation of N (N234-{N230 N234 N235})	Deamidation of N (1)	Single Protein		MS3_10510.1	21	35	35	21	35	21	398	427	100	Confident
518	MS3_04342.1				52.0944	72.55	31.7	229.557					Single Protein		MS3_04342.1	12	26	26	12	26	12	250	342	100	Confident
712	MS3_05908.1				18.3044	74.84	40.25	227.847					Single Protein		MS3_05908.1	6	7	7	6	7	6	57	61	100	Confident
351	MS3_07606.1				28.3696	86.8	61.2	226.601	Deamidation of N(N186); Oxidation of M(M91)	Deamidation of N(1); Oxidation of M(1)			Single Protein		MS3_07606.1	20	27	27	20	27	20	358	393	100	Confident
7	MS3_06918.1				18.982	64.13	51.09	225.789					Single Protein		MS3_06918.1	9	16	16	9	16	9	146	192	100	Confident
190	MS3_00787.1				62.8085	72.02	54.33	223.88	Deamidation of N(N275, N325); Oxidation of M(M167)	Deamidation of N(2); Oxidation of M(1)			Single Protein		MS3_00787.1	40	58	58	40	58	40	1131	1264	100	Confident
141	MS3_03295.1				34.0645	79.81	34.29	220.882	Deamidation of Q(Q83)	Deamidation of Q(1)	Deamidation of Q (Q250-{Q250 Q253})	Deamidation of Q (1)	Single Protein		MS3_03295.1	9	14	14	9	14	9	279	294	100	Confident
611	MS3_03084.1				13.048	100	31.25	215.724	Deamidation of Q(Q47)	Deamidation of Q(1)			Single Protein		MS3_03084.1	8	12	12	8	12	8	93	109	100	Confident
604	MS3_08503.1				21.3771	69.19	37.3	212.799					Single Protein		MS3_08503.1	5	9	9	5	9	5	72	82	100	Confident
1016	MS3_08262.1				14.9889	100	41.04	212.392					Single Protein		MS3_08262.1	5	7	6	4	6	4	97	106	100	Confident
1029	MS3_00219.1				8.59822	100	27.27	212.364	Deamidation of N(N36)	Deamidation of N(1)			Single Protein		MS3_00219.1	4	8	8	4	8	4	67	140	100	Confident
858	MS3_00436.1				8.20611	100	20.83	212.18					Single Protein		MS3_00436.1	2	3	3	2	3	2	23	27	100	Confident
97	MS3_06798.1				35.6486	73.91	33.54	210.04	Deamidation of Q(Q95)	Deamidation of Q(1)			Single Protein		MS3_06798.1	10	20	20	10	20	10	175	198	100	Confident
466	MS3_05219.1				28.163	89.84	52.44	209.544					Single Protein		MS3_05219.1	12	21	21	12	21	12	165	188	100	Confident
43	MS3_08684.1				51.8042	69.69	38.27	202.868			Deamidation of N (N137-{N137 Q138})	Deamidation of N (1)	Single Protein		MS3_08684.1	20	30	30	20	30	20	646	684	100	Confident
204	MS3_00286.1				35.4557	72.58	28.06	189.316					Single Protein		MS3_00286.1	7	17	17	7	17	7	127	175	100	Confident
213	MS3_08530.1				12.8627	100	37.07	185.255	Deamidation of N(N12)	Deamidation of N(1)			Single Protein		MS3_08530.1	5	5	5	5	5	5	44	55	100	Confident
57	MS3_01952.1				31.748	50.35	71.83	183.276	Deamidation of Q(Q71)	Deamidation of Q(1)	Deamidation of N (N100-{Q91 N92 Q99 N100 Q107}, N209-{N205 N209})	Deamidation of N (2)	Single Protein		MS3_01952.1	22	28	27	22	28	22	361	416	100	Confident
878	MS3_05735.1				16.8233	100	39.16	182.451			Deamidation of N (N108-{N105 N108 Q114 Q117})	Deamidation of N (1)	Single Protein		MS3_05735.1	7	13	13	7	13	7	64	82	100	Confident
790	MS3_09920.1				125.596	71.92	30.78	178.005	Deamidation of N(N479, N621, N628); Deamidation of Q(Q545)	Deamidation of N(3); Deamidation of Q(1)	Deamidation of N (N431-{N431 Q432}, N689-{N672 N673 N689 N691 Q694})	Deamidation of N (2)	Single Protein		MS3_09920.1	64	95	95	64	95	64	1652	1758	100	Confident
27	MS3_11139.1				15.2597	76.64	35.77	177.827					Single Protein		MS3_11139.1	4	5	2	2	2	2	62	73	100	Confident
468	MS3_04474.1				44.2261	59.32	41.47	177.623	Oxidation of M(M90, M352, M368)	Oxidation of M(3)			Single Protein		MS3_04474.1	14	20	18	13	18	13	170	196	100	Confident
756	MS3_01650.1				22.2757	100	52.28	176.566	Deamidation of N(N36)	Deamidation of N(1)			Single Protein		MS3_01650.1	15	20	20	15	20	15	226	254	100	Confident
782	MS3_03976.1				27.1524	89.26	36.78	175.978	Deamidation of N(N53); Oxidation of M(M218)	Deamidation of N(1); Oxidation of M(1)			Single Protein		MS3_03976.1	13	21	8	3	8	3	512	606	100	Confident
964	MS3_02734.1				20.8386	83.51	45.88	174.135					Single Protein		MS3_02734.1	7	8	8	7	8	7	101	113	100	Confident
157	MS3_09620.1				16.4393	100	17.01	173.209					Single Protein		MS3_09620.1	2	4	4	2	4	2	44	48	100	Confident
917	MS3_05976.1				25.2805	76.55	53.98	171.082					Single Protein		MS3_05976.1	11	16	15	10	15	10	230	265	100	Confident
77	MS3_00886.1				35.4342	58.15	33.23	170.04	Deamidation of N(N257, N269)	Deamidation of N(2)	Deamidation of Q (Q184-{Q184 N189}, Q271-{Q271 N272})	Deamidation of Q (2)	Single Protein		MS3_00886.1	15	25	25	15	25	15	181	306	100	Confident
887	MS3_05125.1				33.4586	79.38	51.89	169.302	Deamidation of N(N109); Deamidation of Q(Q65)	Deamidation of N(1); Deamidation of Q(1)	Deamidation of N (N89-{Q88 N89 N92}), Deamidation of Q (Q182-{Q172 Q175 N177 N178 N179 Q182 N183})	Deamidation of N (1), Deamidation of Q (1)	Single Protein		MS3_05125.1	24	33	33	24	33	24	247	285	100	Confident
443	MS3_09914.1				68.9857	74.23	45.54	167.582	Deamidation of N(N18); Oxidation of M(M257)	Deamidation of N(1); Oxidation of M(1)	Deamidation of Q (Q341-{N339 Q341}, Q511-{Q511 N517 Q518 N524})	Deamidation of Q (2)	Single Protein		MS3_09914.1	30	45	44	29	44	29	677	780	100	Confident
3	MS3_02685.1				25.602	70.94	48.72	166.475					Single Protein		MS3_02685.1	11	18	17	10	17	10	157	194	100	Confident
318	MS3_03387.1				8.85625	100	13.16	165.277					Single Protein		MS3_03387.1	2	4	4	2	4	2	28	33	100	Confident
212	MS3_08926.1				61.1007	86.01	51.57	163.744	Deamidation of N(N175, N397); Deamidation of Q(Q336); Oxidation of M(M143)	Deamidation of N(2); Deamidation of Q(1); Oxidation of M(1)			Single Protein		MS3_08926.1	29	54	54	29	54	29	536	597	100	Confident
1040	MS3_07531.1				24.89	77.17	42.01	157.97					Single Protein		MS3_07531.1	7	14	14	7	14	7	115	128	100	Confident
483	MS3_03766.1				39.7459	90.3	41.55	157.863	Deamidation of N(N55, N85, N145); Deamidation of Q(Q57); Oxidation of M(M128)	Deamidation of N(3); Deamidation of Q(1); Oxidation of M(1)			Single Protein		MS3_03766.1	16	29	29	16	29	16	278	302	100	Confident
242	MS3_04159.1				8.32111	100	60.27	157.653	Deamidation of N(N36)	Deamidation of N(1)			Single Protein		MS3_04159.1	5	5	5	5	5	5	23	26	100	Confident
814	MS3_02476.1				35.78	100	32.03	155.393					Single Protein		MS3_02476.1	11	26	26	11	26	11	131	168	100	Confident
445	MS3_10365.1				8.69478	50.65	28.57	153.785					Single Protein		MS3_10365.1	3	3	3	3	3	3	18	18	100	Confident
913	MS3_04155.1				13.9428	74.59	23.77	152.956					Single Protein		MS3_04155.1	2	3	3	2	3	2	24	24	100	Confident
327	MS3_07081.1				14.6453	53.03	30.3	151.153	Deamidation of Q(Q79)	Deamidation of Q(1)			Single Protein		MS3_07081.1	4	4	4	4	4	4	18	18	100	Confident
559	MS3_05038.1				8.26933	47.37	31.58	150.884					Single Protein		MS3_05038.1	2	3	3	2	3	2	12	15	100	Confident
689	MS3_06126.1				50.4849	80.54	47.87	148.89	Deamidation of N(N75, N193); Deamidation of Q(Q89)	Deamidation of N(2); Deamidation of Q(1)	Deamidation of Q (Q190-{Q190 N191})	Deamidation of Q (1)	Single Protein		MS3_06126.1	21	35	35	21	35	21	475	568	100	Confident
312	MS3_02176.1				17.8433	82.61	36.02	148.447	Oxidation of M(M57)	Oxidation of M(1)			Single Protein		MS3_02176.1	5	6	6	5	6	5	48	53	100	Confident
324	MS3_07464.1				49.1943	82.48	38.14	147.934					Single Protein		MS3_07464.1	14	39	39	14	39	14	316	387	100	Confident
742	MS3_01173.1				10.116	100	63.22	147.892	Oxidation of M(M24)	Oxidation of M(1)			Single Protein		MS3_01173.1	7	9	7	5	8	6	43	57	100	Confident
347	MS3_01922.1				16.4291	81.21	19.46	146.732					Single Protein		MS3_01922.1	3	9	5	2	5	2	128	135	100	Confident
660	MS3_02504.1				24.6178	62.77	18.18	143.6					Single Protein		MS3_02504.1	3	5	5	3	5	3	39	41	100	Confident
826	MS3_09240.1				22.5818	100	61.58	141.682					Single Protein		MS3_09240.1	10	11	10	9	10	9	140	164	100	Confident
1048	MS3_10043.1				12.1108	100	73.79	141.681	Oxidation of M(M90)	Oxidation of M(1)			Single Protein		MS3_10043.1	7	7	7	7	7	7	54	64	100	Confident
874	MS3_10209.1				37.9608	80.29	36.47	138.051					Single Protein		MS3_10209.1	10	19	11	4	11	4	116	126	100	Confident
101	MS3_11601.1				8.71209	60	36.25	137.917					Single Protein		MS3_11601.1	4	4	4	4	4	4	17	22	100	Confident
207	MS3_05953.1				21.8162	84.38	23.96	137.564	Deamidation of N(N109)	Deamidation of N(1)			Single Protein		MS3_05953.1	5	8	7	4	8	5	69	81	100	Confident
595	MS3_04412.1				9.76977	100	28.24	137.127					Single Protein		MS3_04412.1	3	5	5	3	5	3	19	25	100	Confident
925	MS3_09110.1				18.0494	100	33.54	136.709					Single Protein		MS3_09110.1	5	7	5	4	5	4	75	94	100	Confident
131	MS3_00880.1				23.4665	70.44	19.7	136.44	Deamidation of N(N63)	Deamidation of N(1)			Single Protein		MS3_00880.1	6	10	9	5	9	5	62	68	100	Confident
1	MS3_00048.1				23.2655	62.56	21.18	136.419	Oxidation of M(M64)	Oxidation of M(1)			Single Protein		MS3_00048.1	5	10	10	5	10	5	69	82	100	Confident
280	MS3_01920.1				9.62643	100	36.78	132.674					Single Protein		MS3_01920.1	2	2	2	2	2	2	19	26	100	Confident
960	MS3_00074.1				26.0083	54.27	24.79	129.59			Deamidation of N (N55-{N55 N56 N58 Q63})	Deamidation of N (1)	Single Protein		MS3_00074.1	4	7	7	4	7	4	33	39	100	Confident
548	MS3_05252.1				17.4735	66.45	49.03	128.497					Single Protein		MS3_05252.1	7	9	9	7	9	7	38	42	100	Confident
733	MS3_11059.1				31.9562	68.44	32.98	127.038	Deamidation of N(N202)	Deamidation of N(1)			Single Protein		MS3_11059.1	9	19	12	5	16	8	150	173	100	Confident
831	MS3_03938.1				20.7606	84.15	34.43	126.149					Single Protein		MS3_03938.1	6	13	11	4	12	5	60	72	100	Confident
72	MS3_07481.1				74.0992	73.73	45.78	125.885	Deamidation of Q(Q551)	Deamidation of Q(1)	Deamidation of N (N569-{N569 N570})	Deamidation of N (1)	Single Protein		MS3_07481.1	35	58	58	35	58	35	815	922	100	Confident
653	MS3_01653.1				13.3487	100	22.88	125.63					Single Protein		MS3_01653.1	3	3	3	3	3	3	43	44	100	Confident
1007	MS3_06944.1				14.9373	53.13	37.5	125.54					Single Protein		MS3_06944.1	3	6	6	3	6	3	37	48	100	Confident
582	MS3_11544.1				14.7466	100	41.73	124.747					Single Protein		MS3_11544.1	4	4	4	4	4	4	36	38	100	Confident
892	MS3_07905.1				61.7594	54.12	8.78	122.868			Deamidation of N (N535-{N531 N532 N535})	Deamidation of N (1)	Single Protein		MS3_07905.1	6	14	14	6	14	6	75	98	100	Confident
21	MS3_04602.1				9.36265	57.14	25	120.236					Single Protein		MS3_04602.1	2	4	4	2	4	2	9	13	100	Confident
941	MS3_01153.1				30.3625	36.33	15.83	117.141	Oxidation of M(M1, M142)	Oxidation of M(2)			Single Protein		MS3_01153.1	4	4	4	4	4	4	42	44	100	Confident
1014	MS3_05877.1				8.70257	100	10.96	116.263	Oxidation of M(M63)	Oxidation of M(1)			Single Protein		MS3_05877.1	2	4	4	2	4	2	20	22	100	Confident
425	MS3_07487.1				17.2379	55.92	21.05	114.192					Single Protein		MS3_07487.1	3	3	3	3	3	3	22	22	100	Confident
927	MS3_02690.1				47.1555	52.68	25.61	113.475					Single Protein		MS3_02690.1	9	24	24	9	24	9	99	134	100	Confident
259	MS3_05150.1				40.4256	83.33	27.78	110.055	Oxidation of M(M174)	Oxidation of M(1)			Single Protein		MS3_05150.1	9	16	15	9	16	9	105	124	100	Confident
412	MS3_01585.1				21.6551	69.54	40.1	109.823					Single Protein		MS3_01585.1	6	8	8	6	8	6	40	71	100	Confident
56	MS3_09510.1				34.2376	72.73	20.13	105.768	Oxidation of M(M143)	Oxidation of M(1)			Single Protein		MS3_09510.1	6	12	12	6	12	6	85	109	100	Confident
736	MS3_06748.1				49.661	54.63	66.82	105.699	Deamidation of Q(Q11, Q94); Oxidation of M(M1, M164, M257, M267, M330, M363, M388)	Deamidation of Q(2); Oxidation of M(7)	Deamidation of N (N100-{Q83 N89 N99 N100})	Deamidation of N (1)	Single Protein		MS3_06748.1	37	54	5	3	9	5	545	621	100	Confident
881	MS3_01983.1				13.6993	100	15.97	103.653					Single Protein		MS3_01983.1	3	5	5	3	5	3	35	40	100	Confident
396	MS3_00756.1				95.7103	76.16	39.81	101.906	Deamidation of N(N63, N152, N367, N419); Oxidation of M(M500, M618)	Deamidation of N(4); Oxidation of M(2)			Single Protein		MS3_00756.1	38	66	43	26	43	26	719	824	100	Confident
1071	MS3_01871.1				25.7509	100	40.97	101.202	Deamidation of N(N22); Oxidation of M(M198)	Deamidation of N(1); Oxidation of M(1)			Single Protein		MS3_01871.1	12	19	15	8	15	8	373	476	100	Confident
775	MS3_09457.1				32.503	81.43	21.79	99.8663					Single Protein		MS3_09457.1	6	11	11	6	11	6	68	80	100	Confident
614	MS3_02003.1				231.365	69.87	19.28	98.1718	Oxidation of M(M1308, M1556)	Oxidation of M(2)	Deamidation of N (N1359-{N1359 N1365 N1368})	Deamidation of N (1)	Single Protein		MS3_02003.1	51	101	100	51	100	51	1121	1277	100	Confident
10	MS3_03273.1				16.4416	55.32	15.6	95.5842					Single Protein		MS3_03273.1	2	3	3	2	3	2	18	20	100	Confident
195	MS3_04025.1				31.5941	55.91	16.13	95.23					Single Protein		MS3_04025.1	3	6	6	3	6	3	47	71	100	Confident
1001	MS3_04789.1				16.0193	76.43	35.71	94.1261					Single Protein		MS3_04789.1	3	3	3	3	3	3	18	19	100	Confident
78	MS3_05587.1				15.9433	58.74	27.27	93.1022	Deamidation of Q(Q58)	Deamidation of Q(1)			Single Protein		MS3_05587.1	4	5	5	4	5	4	19	22	100	Confident
650	MS3_03096.1				52.977	65.82	25.53	92.4873					Single Protein		MS3_03096.1	10	21	21	10	21	10	122	151	100	Confident
142	MS3_08937.1				62.0945	90.96	40.78	92.0179	Deamidation of N(N140, N276); Oxidation of M(M393)	Deamidation of N(2); Oxidation of M(1)			Single Protein		MS3_08937.1	27	37	37	27	37	27	384	420	100	Confident
564	MS3_06584.1				11.6885	100	23.53	89.8647					Single Protein		MS3_06584.1	2	2	2	2	2	2	14	14	100	Confident
383	MS3_08607.1				30.641	64.44	12.96	89.8355					Single Protein		MS3_08607.1	3	4	4	3	4	3	39	50	100	Confident
236	MS3_10385.1				42.1043	79.03	28.23	88.6619					Single Protein		MS3_10385.1	9	13	13	9	13	9	119	130	100	Confident
171	MS3_03041.1				22.7625	80.3	27.59	88.2393	Oxidation of M(M63)	Oxidation of M(1)			Single Protein		MS3_03041.1	6	7	7	6	7	6	34	48	100	Confident
695	MS3_04206.1				22.9925	100	34.47	86.9439	Deamidation of N(N155)	Deamidation of N(1)			Single Protein		MS3_04206.1	7	10	10	7	10	7	59	63	100	Confident
899	MS3_00294.1				24.3614	76.64	47.2	85.8454	Deamidation of N(N180)	Deamidation of N(1)			Single Protein		MS3_00294.1	10	12	12	10	12	10	108	127	100	Confident
920	MS3_00412.1				20.2165	80.34	29.21	85.3074	Oxidation of M(M146)	Oxidation of M(1)			Single Protein		MS3_00412.1	5	8	8	5	8	5	42	45	100	Confident
911	MS3_06443.1				16.1258	100	15.49	83.6768					Single Protein		MS3_06443.1	2	2	2	2	2	2	20	20	100	Confident
880	MS3_02465.1				23.5214	86.98	35.81	83.6616	Deamidation of N(N154); Oxidation of M(M62, M140, M160)	Deamidation of N(1); Oxidation of M(3)			Single Protein		MS3_02465.1	9	14	11	6	11	6	163	364	100	Confident
100	MS3_07730.1				30.962	90.71	26.43	82.2048					Single Protein		MS3_07730.1	6	11	11	6	11	6	62	72	100	Confident
599	MS3_06583.1				20.6341	86.02	20.43	82.1344					Single Protein		MS3_06583.1	3	5	5	3	5	3	31	35	100	Confident
615	MS3_06115.1				6.65036	100	55.17	81.9455					Single Protein		MS3_06115.1	3	3	3	3	3	3	10	11	100	Confident
910	MS3_04275.1				21.4007	71.89	50.27	81.7962					Single Protein		MS3_04275.1	8	9	9	8	9	8	35	48	100	Confident
745	MS3_01160.1				41.9487	70.21	25.27	80.9575	Oxidation of M(M284)	Oxidation of M(1)			Single Protein		MS3_01160.1	6	12	12	6	12	6	66	97	100	Confident
938	MS3_03937.1				41.7111	100	42.03	79.2654	Deamidation of N(N157, N352)	Deamidation of N(2)			Single Protein		MS3_03937.1	16	22	22	16	22	16	155	172	100	Confident
138	MS3_03305.1				67.0823	60.03	26.32	78.6066					Single Protein		MS3_03305.1	14	24	24	14	24	14	215	247	100	Confident
806	MS3_04276.1				20.5121	100	27.49	78.4861	Deamidation of N(N43); Oxidation of M(M32, M41)	Deamidation of N(1); Oxidation of M(2)			Single Protein		MS3_04276.1	5	7	7	5	7	5	50	60	100	Confident
842	MS3_01370.1				24.1805	30.67	8	78.3435					Single Protein		MS3_01370.1	2	2	2	2	2	2	22	35	100	Confident
288	MS3_09076.1				30.2964	61.94	16.79	77.5048					Single Protein		MS3_09076.1	4	5	5	4	5	4	29	35	100	Confident
241	MS3_07156.1				24.2682	28.45	14.66	77.1565					Single Protein		MS3_07156.1	2	2	2	2	2	2	9	11	100	Confident
694	MS3_01794.1				16.0242	62.41	18.44	74.6394					Single Protein		MS3_01794.1	3	5	5	3	5	3	18	21	100	Confident
869	MS3_00676.1				29.7144	72.01	32.46	74.1894					Single Protein		MS3_00676.1	7	8	8	7	8	7	63	78	100	Confident
160	MS3_02359.1				17.6868	100	62.82	73.454					Single Protein		MS3_02359.1	9	11	11	9	11	9	38	40	100	Confident
206	MS3_08689.1				48.6466	77.68	16.86	72.7968	Deamidation of N(N127)	Deamidation of N(1)			Single Protein		MS3_08689.1	7	23	23	7	23	7	75	440	100	Confident
986	MS3_05351.1				22.233	71.73	19.9	72.3103	Deamidation of N(N51)	Deamidation of N(1)			Single Protein		MS3_05351.1	8	9	6	5	6	5	73	84	100	Confident
977	MS3_10161.1				16.6427	100	28.08	71.6034					Single Protein		MS3_10161.1	4	8	6	2	6	2	34	63	100	Confident
409	MS3_06527.1				234.123	73.75	60.45	71.4247	Deamidation of N(N388, N1275, N1637, N1837, N1941, N1948); Deamidation of Q(Q799, Q1630); Oxidation of M(M1, M116, M660, M1371, M1713, M1811, M1870)	Deamidation of N(6); Deamidation of Q(2); Oxidation of M(7)	Deamidation of N (N130-{Q129 N130}, N1232-{N1232 Q1235}, N1858-{N1857 N1858})	Deamidation of N (3)	Single Protein		MS3_06527.1	157	247	247	157	247	157	3934	4457	100	Confident
420	MS3_00862.1				22.3624	87.5	10.5	71.2926	Deamidation of Q(Q136)	Deamidation of Q(1)			Single Protein		MS3_00862.1	3	11	10	2	10	2	65	81	100	Confident
444	MS3_08479.1				50.8753	93.76	46.45	70.618	Deamidation of N(N359); Oxidation of M(M201, M208, M280)	Deamidation of N(1); Oxidation of M(3)			Single Protein		MS3_08479.1	22	36	36	22	36	22	242	305	100	Confident
939	MS3_03443.1				20.7209	83.43	16.57	70.0235					Single Protein		MS3_03443.1	3	4	4	3	4	3	22	23	100	Confident
759	MS3_09958.1				36.1338	100	10.34	69.5296					Single Protein		MS3_09958.1	3	7	7	3	7	3	36	76	100	Confident
862	MS3_04887.1				43.8672	57.47	36.96	69.2531					Single Protein		MS3_04887.1	13	22	22	13	22	13	95	123	100	Confident
314	MS3_04193.1				15.8652	100	29.5	69.2003					Single Protein		MS3_04193.1	4	5	5	4	5	4	25	33	100	Confident
374	MS3_02428.1				15.5879	100	39.23	68.7682	Oxidation of M(M30)	Oxidation of M(1)			Single Protein		MS3_02428.1	4	6	6	4	6	4	37	39	100	Confident
520	MS3_05910.1				21.932	71.21	32.83	67.7263					Single Protein		MS3_05910.1	4	4	4	4	4	4	42	44	100	Confident
298	MS3_06147.1				38.0638	79.23	30.86	67.2236					Single Protein		MS3_06147.1	9	16	16	9	16	9	66	100	100	Confident
750	MS3_04550.1				32.7952	51.02	12.24	66.801					Single Protein		MS3_04550.1	3	4	4	3	4	3	32	37	100	Confident
411	MS3_10486.1				16.2716	100	21.13	65.9168					Single Protein		MS3_10486.1	3	5	4	2	4	2	26	47	100	Confident
58	MS3_00277.1				42.531	100	33.96	65.7445					Single Protein		MS3_00277.1	12	21	21	12	21	12	139	182	100	Confident
1044	MS3_07411.1				39.853	100	29.94	65.3863	Deamidation of N(N163)	Deamidation of N(1)			Single Protein		MS3_07411.1	10	19	18	9	19	10	87	104	100	Confident
293	MS3_07345.1				33.4426	72.39	18.86	64.8031					Single Protein		MS3_07345.1	5	7	7	5	7	5	39	48	100	Confident
39	MS3_00143.1				36.6471	72.62	26.22	64.44			Deamidation of Q (Q74-{Q68 Q74 Q75})	Deamidation of Q (1)	Single Protein		MS3_00143.1	8	17	17	8	17	8	70	85	100	Confident
579	MS3_06080.1				25.9719	89.18	22.94	63.9297					Single Protein		MS3_06080.1	4	4	4	4	4	4	25	30	100	Confident
233	MS3_04386.1				22.2967	73.53	30.88	63.2381					Single Protein		MS3_04386.1	4	6	6	4	6	4	25	29	100	Confident
841	MS3_01406.1				20.1248	79.03	20.43	62.3551	Oxidation of M(M92)	Oxidation of M(1)			Single Protein		MS3_01406.1	2	4	4	2	4	2	15	175	100	Confident
309	MS3_08092.1				50.3927	31.36	16.01	61.7704			Deamidation of Q (Q179-{Q172 N173 Q179 N181 Q186 Q191 Q192})	Deamidation of Q (1)	Single Protein		MS3_08092.1	7	8	8	7	8	7	33	44	100	Confident
626	MS3_04688.1				14.8838	78.03	29.55	60.8679					Single Protein		MS3_04688.1	3	5	5	3	5	3	14	21	100	Confident
945	MS3_04178.1				34.4333	91.78	12.17	60.6762					Single Protein		MS3_04178.1	3	10	10	3	10	3	43	52	100	Confident
192	MS3_09994.1				63.1366	62.61	28.87	59.7643	Deamidation of N(N333)	Deamidation of N(1)			Single Protein		MS3_09994.1	13	19	10	8	19	13	104	129	100	Confident
231	MS3_06051.1				15.5471	100	33.58	59.4725					Single Protein		MS3_06051.1	2	3	3	2	3	2	14	14	100	Confident
1086	MS3_08024.1				39.1487	53.18	11.85	58.9125					Single Protein		MS3_08024.1	3	7	7	3	7	3	37	44	100	Confident
162	MS3_01504.1				42.9665	74.59	17.03	58.4737					Single Protein		MS3_01504.1	5	8	8	5	8	5	44	52	100	Confident
665	MS3_02494.1				41.9353	64.77	14.91	58.3844					Single Protein		MS3_02494.1	5	9	9	5	9	5	38	48	100	Confident
35	MS3_00779.1				13.4376	100	19.4	58.2704					Single Protein		MS3_00779.1	2	2	2	2	2	2	15	15	100	Confident
13	MS3_07733.1				86.7544	96	23.47	58.2009					Single Protein		MS3_07733.1	16	38	38	16	38	16	201	256	100	Confident
758	MS3_09682.1				16.5346	100	16.44	58.1316					Single Protein		MS3_09682.1	2	8	8	2	8	2	16	584	100	Confident
515	MS3_06789.1				17.5191	81.94	34.84	58.0416					Single Protein		MS3_06789.1	4	6	6	4	6	4	17	30	100	Confident
578	MS3_05000.1				25.666	70.26	34.48	58.0195	Deamidation of N(N165)	Deamidation of N(1)			Single Protein		MS3_05000.1	7	7	7	7	7	7	33	35	100	Confident
731	MS3_05631.1				80.3119	96.51	38.69	58.019			Deamidation of N (N56-{Q48 N51 N53 N56})	Deamidation of N (1)	Single Protein		MS3_05631.1	28	52	52	28	52	28	310	382	100	Confident
74	MS3_09286.1				27.1154	100	39.75	57.6513					Single Protein		MS3_09286.1	9	11	11	9	11	9	45	49	100	Confident
944	MS3_03800.1				13.2156	100	21.3	57.6293					Single Protein		MS3_03800.1	3	3	3	3	3	3	14	15	100	Confident
330	MS3_05437.1				24.898	73.49	16.74	57.509					Single Protein		MS3_05437.1	2	2	2	2	2	2	17	17	100	Confident
649	MS3_03226.1				27.1604	61.98	21.49	57.3468					Single Protein		MS3_03226.1	5	7	7	5	7	5	25	35	100	Confident
636	MS3_06462.1				20.1974	72.83	43.48	57.1086					Single Protein		MS3_06462.1	5	8	7	4	7	4	41	45	100	Confident
336	MS3_04225.1				46.7146	80.67	40.57	57.0463					Single Protein		MS3_04225.1	13	21	21	13	21	13	112	127	100	Confident
115	MS3_05322.1				75.6784	67.56	29.3	56.6696	Deamidation of N(N13)	Deamidation of N(1)			Single Protein		MS3_05322.1	20	35	35	20	35	20	157	192	100	Confident
419	MS3_05541.1				14.1369	100	27.42	56.5814					Single Protein		MS3_05541.1	3	3	3	3	3	3	18	18	100	Confident
947	MS3_03203.1				13.5392	35.29	15.97	56.5814					Single Protein		MS3_03203.1	2	3	3	2	3	2	5	7	100	Confident
335	MS3_01578.1				11.1214	100	25.77	55.9981					Single Protein		MS3_01578.1	2	3	3	2	3	2	13	14	100	Confident
399	MS3_04596.1				12.9589	100	17.12	55.0522					Single Protein		MS3_04596.1	2	2	2	2	2	2	13	14	100	Confident
845	MS3_04011.1				23.9625	73.81	12.86	54.7562					Single Protein		MS3_04011.1	2	3	3	2	3	2	15	18	100	Confident
948	MS3_03933.1				80.4092	80.83	31.04	54.1814	Deamidation of N(N150)	Deamidation of N(1)			Single Protein		MS3_03933.1	19	27	27	19	27	19	239	268	100	Confident
495	MS3_00851.1				24.9399	86.04	20.72	53.9153					Single Protein		MS3_00851.1	3	8	8	3	8	3	18	23	100	Confident
551	MS3_11040.1				20.8247	100	19.89	53.768					Single Protein		MS3_11040.1	3	4	4	3	4	3	16	17	100	Confident
616	MS3_08996.1				19.1745	81.93	21.69	53.1729					Single Protein		MS3_08996.1	2	3	3	2	3	2	14	16	100	Confident
863	MS3_00663.1				25.8811	65.22	9.57	53.1374					Single Protein		MS3_00663.1	2	3	3	2	3	2	21	22	100	Confident
513	MS3_06380.1				50.3273	84.06	36.9	53.109	Oxidation of M(M75, M187)	Oxidation of M(2)			Single Protein		MS3_06380.1	12	22	22	12	22	12	121	146	100	Confident
469	MS3_09652.1				24.5224	77.39	31.74	52.8305	Oxidation of M(M127)	Oxidation of M(1)			Single Protein		MS3_09652.1	5	7	7	5	7	5	20	29	100	Confident
234	MS3_07396.1				9.19926	100	36.9	52.5399					Single Protein		MS3_07396.1	3	3	3	3	3	3	9	10	100	Confident
106	MS3_03417.1				52.2994	66.38	19.7	52.5357					Single Protein		MS3_03417.1	8	20	20	8	20	8	76	97	100	Confident
33	MS3_04246.1				90.7615	83.02	36.95	52.0516	Deamidation of Q(Q678)	Deamidation of Q(1)			Single Protein		MS3_04246.1	28	61	61	28	61	28	284	366	100	Confident
1004	MS3_04153.1				9.55294	100	27.06	51.9218					Single Protein		MS3_04153.1	2	2	2	2	2	2	7	7	100	Confident
424	MS3_02688.1				63.9856	57.29	15.47	51.8159					Single Protein		MS3_02688.1	7	11	11	7	11	7	46	53	100	Confident
253	MS3_02085.1				74.9676	94.59	33.48	51.3864					Single Protein		MS3_02085.1	16	31	31	16	31	16	148	192	100	Confident
89	MS3_01964.1				41.081	100	40.22	51.1016					Single Protein		MS3_01964.1	11	17	17	11	17	11	72	98	100	Confident
526	MS3_04129.1				12.7098	100	28.57	50.5192	Deamidation of Q(Q52)	Deamidation of Q(1)			Single Protein		MS3_04129.1	3	3	3	3	3	3	10	11	100	Confident
1081	MS3_07556.1				45.7557	86.25	20.05	50.1232					Single Protein		MS3_07556.1	5	11	11	5	11	5	43	67	100	Confident
264	MS3_00257.1				24.2562	85.1	31.25	49.9963					Single Protein		MS3_00257.1	5	6	6	5	6	5	27	30	100	Confident
384	MS3_05807.1				29.8692	63.14	14.6	49.4732					Single Protein		MS3_05807.1	3	3	3	3	3	3	18	18	100	Confident
702	MS3_09680.1				62.3326	82.26	15.23	48.7804					Single Protein		MS3_09680.1	7	14	14	7	14	7	82	96	100	Confident
524	MS3_07854.1				18.8405	100	38.82	48.5269			Deamidation of N (N133-{Q126 N133 N134 N137})	Deamidation of N (1)	Single Protein		MS3_07854.1	5	6	6	5	6	5	22	23	100	Confident
98	MS3_02780.1				19.247	100	13.1	48.4984	Oxidation of M(M147)	Oxidation of M(1)			Single Protein		MS3_02780.1	2	7	7	2	7	2	14	58	100	Confident
641	MS3_08504.1				19.4673	70	8.82	48.4984			Deamidation of N (N71-{N70 N71})	Deamidation of N (1)	Single Protein		MS3_08504.1	2	2	2	2	2	2	9	9	100	Confident
1051	MS3_01261.1				70.0921	86.26	44.25	48.4761					Single Protein		MS3_01261.1	22	35	35	22	35	22	164	207	100	Confident
1032	MS3_00196.1				48.2291	49.53	10	48.4224					Single Protein		MS3_00196.1	4	7	7	4	7	4	32	38	100	Confident
289	MS3_00508.1				74.2986	80.77	29.51	47.9116	Deamidation of N(N509)	Deamidation of N(1)			Single Protein		MS3_00508.1	19	32	32	19	32	19	208	231	100	Confident
201	MS3_03521.1				34.2591	88.5	16.29	47.798					Single Protein		MS3_03521.1	4	9	9	4	9	4	32	40	100	Confident
139	MS3_01852.1				48.8157	66.29	15.72	47.6697					Single Protein		MS3_01852.1	7	10	10	7	10	7	36	45	100	Confident
829	MS3_03818.1				25.729	100	28.18	47.5799					Single Protein		MS3_03818.1	5	6	6	5	6	5	32	35	100	Confident
255	MS3_07693.1				83.2335	49.15	34.17	47.5235	Deamidation of N(N753)	Deamidation of N(1)	Deamidation of N (N648-{Q647 N648 Q649})	Deamidation of N (1)	Single Protein		MS3_07693.1	21	34	34	21	34	21	182	219	100	Confident
275	MS3_09814.1				23.6938	75.94	20.28	47.5071					Single Protein		MS3_09814.1	3	5	5	3	5	3	20	23	100	Confident
261	MS3_07729.1				39.0495	90.26	35.53	47.0126					Single Protein		MS3_07729.1	9	19	19	9	19	9	78	109	100	Confident
461	MS3_07100.1				53.8846	88.17	35.48	47.0033					Single Protein		MS3_07100.1	16	28	28	16	28	16	127	156	100	Confident
996	MS3_04906.1				95.919	75.06	24.83	46.8052	Oxidation of M(M457, M590)	Oxidation of M(2)			Single Protein		MS3_04906.1	20	45	17	6	17	6	257	315	100	Confident
283	MS3_07096.1				18.4275	100	13.75	46.6797					Single Protein		MS3_07096.1	2	4	4	2	4	2	15	17	100	Confident
346	MS3_08450.1				57.6987	87.83	38.39	46.3483	Deamidation of N(N210, N267)	Deamidation of N(2)			Single Protein		MS3_08450.1	20	27	27	20	27	20	124	154	100	Confident
630	MS3_10453.1				46.5748	77.83	20.75	46.094					Single Protein		MS3_10453.1	5	12	12	5	12	5	45	89	100	Confident
52	MS3_01749.1				58.5289	67.86	16.92	45.8952					Single Protein		MS3_01749.1	6	16	16	6	16	6	54	107	100	Confident
209	MS3_04158.1				42.7634	27.82	4.26	45.8769					Single Protein		MS3_04158.1	2	4	4	2	4	2	8	16	100	Confident
976	MS3_06347.1				22.8736	78.89	24.12	45.7697					Single Protein		MS3_06347.1	4	8	8	4	8	4	17	25	100	Confident
91	MS3_02709.1				42.5077	100	13.09	45.6206					Single Protein		MS3_02709.1	4	12	12	4	12	4	29	127	100	Confident
682	MS3_05537.1				17.3779	100	20.53	44.9654					Single Protein		MS3_05537.1	2	3	3	2	3	2	14	15	100	Confident
46	MS3_01353.1				39.4697	41.71	6.91	44.9323					Single Protein		MS3_01353.1	2	2	2	2	2	2	14	17	100	Confident
605	MS3_08480.1				72.6669	43.03	11.82	44.5957	Deamidation of N(N284); Oxidation of M(M376)	Deamidation of N(1); Oxidation of M(1)			Single Protein		MS3_08480.1	8	12	12	8	12	8	35	49	100	Confident
755	MS3_06471.1				21.1575	84.24	36.41	43.9736					Single Protein		MS3_06471.1	4	6	6	4	6	4	21	25	100	Confident
1023	MS3_08765.1				12.287	66.96	41.96	43.7563					Single Protein		MS3_08765.1	3	3	3	3	3	3	6	6	100	Confident
73	MS3_03775.1				53.6264	70.02	33.6	43.6706					Single Protein		MS3_03775.1	11	17	17	11	17	11	78	95	100	Confident
906	MS3_05950.1				16.7003	100	18.18	43.5242					Single Protein		MS3_05950.1	3	9	9	3	9	3	11	19	100	Confident
1046	MS3_03695.1				102.478	89.14	14.67	43.4638	Oxidation of M(M164, M280)	Oxidation of M(2)			Single Protein		MS3_03695.1	12	34	34	12	34	12	133	245	100	Confident
85	MS3_09644.1				48.7421	56.06	17.16	43.4485					Single Protein		MS3_09644.1	7	11	9	6	10	6	62	67	100	Confident
245	MS3_03558.1				32.1414	65.73	12.94	43.3615					Single Protein		MS3_03558.1	3	6	6	3	6	3	20	23	100	Confident
620	MS3_02375.1				21.0999	100	13.83	43.339					Single Protein		MS3_02375.1	2	3	3	2	3	2	15	17	100	Confident
818	MS3_10803.1				71.2735	73.11	21.38	43.3278					Single Protein		MS3_10803.1	13	24	24	13	24	13	106	132	100	Confident
581	MS3_10713.1				71.2771	72.69	20.83	42.5371					Single Protein		MS3_10713.1	11	20	15	8	15	8	203	223	100	Confident
348	MS3_05530.1				50.6437	82.67	21.78	42.0643					Single Protein		MS3_05530.1	7	10	9	7	9	7	57	65	100	Confident
114	MS3_11484.1				21.399	48.37	23.26	41.892					Single Protein		MS3_11484.1	4	8	8	4	8	4	14	19	100	Confident
793	MS3_02539.1				63.8887	66.13	18.44	41.7466					Single Protein		MS3_02539.1	7	16	16	7	16	7	47	60	100	Confident
991	MS3_09233.1				15.7678	83.01	48.37	41.567	Deamidation of N(N106)	Deamidation of N(1)	Deamidation of N (N54-{N54 N64}, N91-{N85 N91 N93 N97})	Deamidation of N (2)	Single Protein		MS3_09233.1	5	10	10	5	10	5	22	37	100	Confident
488	MS3_02318.1				74.6364	54.28	18.44	41.5416	Deamidation of N(N340); Oxidation of M(M573)	Deamidation of N(1); Oxidation of M(1)			Single Protein		MS3_02318.1	11	20	20	11	20	11	61	110	100	Confident
623	MS3_06832.1				34.941	68.85	31.15	41.4494					Single Protein		MS3_06832.1	8	12	12	8	12	8	44	51	100	Confident
773	MS3_08472.1				44.0946	78.8	17.54	40.5657	Deamidation of N(N165)	Deamidation of N(1)			Single Protein		MS3_08472.1	6	13	13	6	13	6	39	50	100	Confident
1077	MS3_10785.1				39.3389	84.96	35.38	40.2157					Single Protein		MS3_10785.1	10	15	15	10	15	10	73	88	100	Confident
803	MS3_10193.1				23.7268	100	53.05	40.1032	Oxidation of M(M203)	Oxidation of M(1)	Deamidation of N (N192-{N192}, N199-{N199 N200 N201 N202 N205})	Deamidation of N (2)	Single Protein		MS3_10193.1	11	11	11	11	11	11	45	46	100	Confident
519	MS3_00626.1				102.778	71.26	35.85	39.7506	Deamidation of N(N576)	Deamidation of N(1)	Deamidation of N (N14-{N14 N17 N27 Q29})	Deamidation of N (1)	Single Protein		MS3_00626.1	28	44	44	28	44	28	281	318	100	Confident
423	MS3_09161.1				25.5708	76.58	38.29	38.9553					Single Protein		MS3_09161.1	8	11	11	8	11	8	31	37	100	Confident
126	MS3_09632.1				31.6663	78.13	14.24	38.9137					Single Protein		MS3_09632.1	3	4	4	3	4	3	24	28	100	Confident
285	MS3_07848.1				37.2091	59.76	7.81	38.4577					Single Protein		MS3_07848.1	2	2	2	2	2	2	15	152	98.8073	Doubtful
405	MS3_01095.1				57.6367	80.12	22.24	38.4208	Deamidation of Q(Q376)	Deamidation of Q(1)			Single Protein		MS3_01095.1	10	16	16	10	16	10	61	76	100	Confident
894	MS3_09518.1				16.2583	100	29.41	38.2757					Single Protein		MS3_09518.1	3	4	4	3	4	3	13	15	100	Confident
577	MS3_11161.1				14.6755	79.85	28.36	38.0025					Single Protein		MS3_11161.1	3	3	3	3	3	3	12	12	100	Confident
1033	MS3_09593.1				14.4977	100	21.54	37.6049					Single Protein		MS3_09593.1	3	3	2	2	2	2	17	18	100	Confident
982	MS3_10187.1				36.7393	74.31	35.78	37.4244					Single Protein		MS3_10187.1	11	17	17	11	17	11	54	66	100	Confident
681	MS3_02752.1				48.8923	71.8	28.85	37.3577	Deamidation of N(N287)	Deamidation of N(1)			Single Protein		MS3_02752.1	10	16	16	10	16	10	72	103	100	Confident
662	MS3_09070.1				86.7179	87.03	17.46	37.1488					Single Protein		MS3_09070.1	16	32	21	7	32	16	152	178	100	Confident
943	MS3_05960.1				22.6404	100	9.38	37.1316					Single Protein		MS3_05960.1	2	4	4	2	4	2	12	13	100	Confident
251	MS3_04493.1				35.4624	56.6	22.01	36.9381					Single Protein		MS3_04493.1	5	7	7	5	7	5	30	32	100	Confident
886	MS3_04870.1				10.8518	72.63	35.79	36.9268					Single Protein		MS3_04870.1	3	3	3	3	3	3	7	10	100	Confident
544	MS3_05755.1				14.6303	79.07	6.98	36.8437	Deamidation of N(N64)	Deamidation of N(1)			Single Protein		MS3_05755.1	2	4	4	2	4	2	10	13	100	Confident
912	MS3_06430.1				24.7997	100	14.9	36.7235					Single Protein		MS3_06430.1	4	5	5	4	5	4	21	28	100	Confident
746	MS3_03615.1				48.5682	87.67	17.35	36.4292					Single Protein		MS3_03615.1	6	11	11	6	11	6	45	59	100	Confident
177	MS3_05453.1				20.1915	67.24	16.09	35.6107					Single Protein		MS3_05453.1	2	3	3	2	3	2	9	12	100	Confident
29	MS3_02061.1				13.7701	79.03	20.16	35.5916					Single Protein		MS3_02061.1	2	4	4	2	4	2	7	9	100	Confident
185	MS3_09539.1				21.6101	65.64	22.05	35.5021					Single Protein		MS3_09539.1	2	4	4	2	4	2	10	13	100	Confident
32	MS3_01988.1				31.8462	100	40.71	34.8775	Oxidation of M(M127)	Oxidation of M(1)			Single Protein		MS3_01988.1	9	12	12	9	12	9	47	59	100	Confident
922	MS3_04872.1				14.8474	52.94	25.74	34.6417					Single Protein		MS3_04872.1	2	2	2	2	2	2	6	6	100	Confident
637	MS3_10106.1				30.3887	85.93	12.17	34.5497					Single Protein		MS3_10106.1	2	5	5	2	5	2	13	20	100	Confident
111	MS3_06559.1				47.4254	69.58	13.44	34.5129	Deamidation of N(N208)	Deamidation of N(1)			Single Protein		MS3_06559.1	5	7	6	5	7	5	28	31	100	Confident
722	MS3_06592.1				28.5885	88.12	28.35	34.2441					Single Protein		MS3_06592.1	6	7	7	6	7	6	23	30	100	Confident
84	MS3_02050.1				17.0718	82.67	12.67	33.9489					Single Protein		MS3_02050.1	2	2	2	2	2	2	8	16	100	Confident
799	MS3_08749.1				22.3152	57.43	19.8	33.5541					Single Protein		MS3_08749.1	2	2	2	2	2	2	11	11	100	Confident
1026	MS3_09473.1				19.3061	100	31.21	33.3602			Deamidation of N (N147-{N146 N147 Q153})	Deamidation of N (1)	Single Protein		MS3_09473.1	3	3	3	3	3	3	21	23	100	Confident
404	MS3_01105.1				17.4932	82.17	29.94	32.8677					Single Protein		MS3_01105.1	3	4	3	2	3	2	16	17	100	Confident
875	MS3_06707.1				64.8966	78.48	11.64	32.8554					Single Protein		MS3_06707.1	5	12	12	5	12	5	43	51	100	Confident
11	MS3_07600.1				19.4155	85.29	16.47	32.6175					Single Protein		MS3_07600.1	3	4	4	3	4	3	16	17	100	Confident
553	MS3_01425.1				59.3418	55.72	6.83	32.418					Single Protein		MS3_01425.1	3	12	12	3	12	3	39	71	100	Confident
532	MS3_09296.1				39.2601	91.83	20	31.6856					Single Protein		MS3_09296.1	5	9	9	5	9	5	31	35	100	Confident
706	MS3_05630.1				82.0716	81.77	28.84	31.5118	Deamidation of N(N133)	Deamidation of N(1)			Single Protein		MS3_05630.1	22	44	44	22	44	22	130	177	100	Confident
552	MS3_09489.1				70.9377	92.75	27.62	31.1966					Single Protein		MS3_09489.1	15	34	34	15	34	15	119	290	100	Confident
429	MS3_00147.1				26.9874	53.47	13.88	31.1064	Oxidation of M(M146)	Oxidation of M(1)			Single Protein		MS3_00147.1	4	6	6	4	6	4	27	34	100	Confident
1060	MS3_05495.1				49.2979	79.39	7.03	30.9679					Single Protein		MS3_05495.1	3	3	3	3	3	3	21	22	100	Confident
570	MS3_01069.1				14.5918	100	20.66	30.8626					Single Protein		MS3_01069.1	2	4	4	2	4	2	7	9	100	Confident
239	MS3_06327.1				21.483	57.36	17.77	30.6767					Single Protein		MS3_06327.1	2	3	3	2	3	2	9	11	100	Confident
498	MS3_09305.1				21.2974	85.94	11.46	30.0589					Single Protein		MS3_09305.1	2	2	2	2	2	2	9	9	100	Confident
968	MS3_06825.1				44.7381	100	34.62	29.9461	Deamidation of Q(Q98)	Deamidation of Q(1)			Single Protein		MS3_06825.1	12	18	18	12	18	12	48	56	100	Confident
661	MS3_08148.1				28.5265	50.39	25.78	29.9136					Single Protein		MS3_08148.1	5	5	5	5	5	5	15	15	100	Confident
215	MS3_10146.1				48.8944	83.22	10.29	29.8117					Single Protein		MS3_10146.1	4	11	11	4	11	4	28	57	100	Confident
855	MS3_08880.1				39.4215	83.71	29.78	29.644					Single Protein		MS3_08880.1	7	8	8	7	8	7	34	39	100	Confident
169	MS3_02453.1				31.2808	80.8	12.68	29.5208					Single Protein		MS3_02453.1	3	6	6	3	6	3	19	26	100	Confident
221	MS3_04995.1				90.3464	63.66	15.66	29.5068	Deamidation of N(N290)	Deamidation of N(1)			Single Protein		MS3_04995.1	10	23	23	10	23	10	97	116	100	Confident
802	MS3_09074.1				14.5639	77.17	18.11	29.4045					Single Protein		MS3_09074.1	2	3	3	2	3	2	6	7	100	Confident
723	MS3_01660.1				28.2333	63.31	10.08	29.099					Single Protein		MS3_01660.1	3	4	4	3	4	3	14	18	100	Confident
528	MS3_08945.1				81.9063	72	14.62	28.984					Single Protein		MS3_08945.1	8	17	17	8	17	8	37	97	100	Confident
366	MS3_01181.1				96.9771	81.57	35.55	28.4364					Single Protein		MS3_01181.1	28	51	51	28	51	28	236	286	100	Confident
994	MS3_11482.1				21.004	100	13.74	27.9798					Single Protein		MS3_11482.1	2	2	2	2	2	2	9	9	100	Confident
849	MS3_08533.1				24.8457	87.04	18.06	27.7668					Single Protein		MS3_08533.1	3	5	5	3	5	3	13	15	100	Confident
143	MS3_05715.1				54.2019	58.54	13.33	27.6343	Oxidation of M(M54)	Oxidation of M(1)			Single Protein		MS3_05715.1	5	7	7	5	7	5	32	41	100	Confident
329	MS3_10721.1				40.122	81.27	11.29	27.6194					Single Protein		MS3_10721.1	3	4	4	3	4	3	22	24	100	Confident
541	MS3_00703.1				34.2576	91.94	21.94	27.4981					Single Protein		MS3_00703.1	7	11	11	7	11	7	33	71	100	Confident
726	MS3_08004.1				23.7307	83.65	12.5	27.3152					Single Protein		MS3_08004.1	2	2	2	2	2	2	8	8	100	Confident
915	MS3_07045.1				35.7465	83.74	23.31	27.17					Single Protein		MS3_07045.1	7	13	13	7	13	7	32	41	100	Confident
158	MS3_07158.1				45.3564	75.95	12.62	26.9364					Single Protein		MS3_07158.1	4	12	12	4	12	4	30	48	100	Confident
539	MS3_05686.1				25.6992	100	18.3	26.27					Single Protein		MS3_05686.1	3	6	6	3	6	3	13	17	100	Confident
248	MS3_05104.1				10.2521	100	27.47	26.1145					Single Protein		MS3_05104.1	2	3	3	2	3	2	5	19	100	Confident
870	MS3_03802.1				86.4097	84.13	20	26.0229					Single Protein		MS3_03802.1	13	32	31	12	31	12	78	206	100	Confident
1024	MS3_10057.1				40.1446	83.8	10.61	25.9548					Single Protein		MS3_10057.1	2	4	4	2	4	2	13	15	100	Confident
562	MS3_11054.1				26.8373	69.67	12.3	25.8494					Single Protein		MS3_11054.1	2	2	2	2	2	2	11	11	100	Confident
671	MS3_10478.1				50.2755	100	13.75	25.1417					Single Protein		MS3_10478.1	5	15	15	5	15	5	32	96	100	Confident
930	MS3_09879.1				18.8027	71.02	14.77	25.0759					Single Protein		MS3_09879.1	2	3	3	2	3	2	11	14	100	Confident
590	MS3_05026.1				17.3736	100	27.52	24.6832					Single Protein		MS3_05026.1	4	5	5	4	5	4	9	10	100	Confident
936	MS3_01386.1				62.9391	74.91	13.08	24.6351	Deamidation of N(N134)	Deamidation of N(1)			Single Protein		MS3_01386.1	7	12	12	7	12	7	31	49	100	Confident
279	MS3_02307.1				39.4575	84.59	27.73	24.6052	Oxidation of M(M195)	Oxidation of M(1)			Single Protein		MS3_02307.1	8	16	16	8	16	8	29	66	100	Confident
364	MS3_04586.1				22.4692	100	25.25	24.5758	Deamidation of Q(Q74)	Deamidation of Q(1)			Single Protein		MS3_04586.1	4	7	7	4	7	4	17	22	100	Confident
721	MS3_00859.1				23.9427	73.97	21.46	24.206					Single Protein		MS3_00859.1	3	4	4	3	4	3	12	12	100	Confident
839	MS3_03420.1				41.3939	91.69	18.01	24.1999					Single Protein		MS3_03420.1	5	11	11	5	11	5	26	37	100	Confident
315	MS3_03517.1				19.5259	100	21.26	24.0634					Single Protein		MS3_03517.1	3	4	4	3	4	3	8	11	100	Confident
643	MS3_08361.1				94.435	74.09	18.49	23.558					Single Protein		MS3_08361.1	13	28	28	13	28	13	76	117	100	Confident
432	MS3_04584.1				70.1066	77.88	17.85	23.4116					Single Protein		MS3_04584.1	8	15	9	4	9	4	56	72	100	Confident
328	MS3_08725.1				55.0692	75.55	18.64	23.3035					Single Protein		MS3_08725.1	8	13	13	8	13	8	29	37	100	Confident
118	MS3_05588.1				89.9523	68.56	16.34	23.0215					Single Protein		MS3_05588.1	11	22	22	11	22	11	73	89	100	Confident
558	MS3_04531.1				99.3974	58.51	20.23	22.9739					Single Protein		MS3_04531.1	12	16	16	12	16	12	55	59	100	Confident
642	MS3_05501.1				30.0101	54.12	9.68	22.6326					Single Protein		MS3_05501.1	2	3	3	2	3	2	11	12	100	Confident
601	MS3_08000.1				34.7038	88.85	21.97	22.3892					Single Protein		MS3_08000.1	6	8	8	6	8	6	19	25	100	Confident
852	MS3_00187.1				40.5761	81.97	12.39	22.1659					Single Protein		MS3_00187.1	4	9	7	3	9	4	25	32	100	Confident
319	MS3_03267.1				72.4412	64.62	18.46	22.1521					Single Protein		MS3_03267.1	9	17	17	9	17	9	52	63	100	Confident
963	MS3_09231.1				41.4313	72.61	9.57	22.108					Single Protein		MS3_09231.1	3	3	3	3	3	3	13	13	100	Confident
808	MS3_10077.1				10.7332	100	27.96	21.9025	Oxidation of M(M78)	Oxidation of M(1)			Single Protein		MS3_10077.1	2	2	2	2	2	2	4	4	100	Confident
389	MS3_07342.1				9.13643	100	31.65	21.4866					Single Protein		MS3_07342.1	2	2	2	2	2	2	3	3	100	Confident
923	MS3_00785.1				47.4519	100	5.39	21.4665					Single Protein		MS3_00785.1	2	6	6	2	6	2	15	27	100	Confident
300	MS3_06996.1				80.3	86.93	11.08	21.3023	Deamidation of N(N278); Oxidation of M(M1)	Deamidation of N(1); Oxidation of M(1)			Single Protein		MS3_06996.1	6	25	25	6	25	6	56	121	100	Confident
60	MS3_02674.1				41.3814	53.23	12.63	21.1466					Single Protein		MS3_02674.1	3	3	3	3	3	3	12	12	100	Confident
766	MS3_02371.1				22.6154	82.27	21.18	21.1418					Single Protein		MS3_02371.1	3	7	6	2	6	2	15	23	100	Confident
258	MS3_02401.1				55.1379	52.16	2.47	21.0303			Deamidation of N (N380-{Q379 N380})	Deamidation of N (1)	Single Protein		MS3_02401.1	2	3	3	2	3	2	17	18	100	Confident
1052	MS3_08406.1				62.3637	77.65	8.38	20.9899					Single Protein		MS3_08406.1	4	13	13	4	13	4	23	38	100	Confident
998	MS3_08871.1				21.3238	100	29.89	20.849					Single Protein		MS3_08871.1	5	6	6	5	6	5	14	17	100	Confident
1050	MS3_06608.1				44.1132	85.68	7.16	20.3203					Single Protein		MS3_06608.1	3	3	3	3	3	3	16	19	100	Confident
566	MS3_05861.1				38.8772	84.87	18.4	20.1813					Single Protein		MS3_05861.1	5	7	7	5	7	5	22	26	100	Confident
180	MS3_00904.1				13.1043	73.73	14.41	20.1392					Single Protein		MS3_00904.1	2	2	2	2	2	2	5	7	100	Confident
705	MS3_05870.1				44.8031	91.92	16.16	20.1144					Single Protein		MS3_05870.1	5	6	6	5	6	5	19	22	100	Confident
529	MS3_05170.1				83.8554	57.65	6.99	20.0158					Single Protein		MS3_05170.1	5	9	9	5	9	5	23	28	100	Confident
635	MS3_00588.1				117.508	75.78	7.47	19.9074	Oxidation of M(M729)	Oxidation of M(1)			Single Protein		MS3_00588.1	7	18	18	7	18	7	39	61	100	Confident
451	MS3_06513.1				21.1456	68.45	14.44	19.8402					Single Protein		MS3_06513.1	2	4	4	2	4	2	6	8	100	Confident
882	MS3_01863.1				86.5166	43.89	10.94	19.8121					Single Protein		MS3_01863.1	7	12	12	7	12	7	34	46	100	Confident
273	MS3_00351.1				40.3209	78.83	5.85	19.776					Single Protein		MS3_00351.1	2	5	5	2	5	2	13	16	100	Confident
1011	MS3_07798.1				56.2291	87.23	10.78	19.7122					Single Protein		MS3_07798.1	3	5	5	3	5	3	17	21	100	Confident
1047	MS3_03311.1				40.2783	67.15	4.9	19.6615					Single Protein		MS3_03311.1	2	3	3	2	3	2	12	14	100	Confident
823	MS3_10816.1				62.0322	90.29	13.49	19.5796					Single Protein		MS3_10816.1	5	15	15	5	15	5	26	41	100	Confident
534	MS3_00852.1				335.853	62.21	32.1	19.5488	Deamidation of Q(Q3050)	Deamidation of Q(1)	Deamidation of N (N656-{N656 Q660})	Deamidation of N (1)	Single Protein		MS3_00852.1	68	128	128	68	128	68	471	618	100	Confident
489	MS3_11550.1				11.8852	100	20.75	19.2163					Single Protein		MS3_11550.1	2	4	4	2	4	2	4	8	100	Confident
103	MS3_03789.1				38.4021	47.49	8.94	19.1506					Single Protein		MS3_03789.1	2	2	2	2	2	2	7	7	100	Confident
345	MS3_10017.1				63.2495	65.62	12.91	19.0732					Single Protein		MS3_10017.1	5	9	9	5	9	5	21	36	100	Confident
183	MS3_03774.1				119.501	64.52	11.24	18.9682					Single Protein		MS3_03774.1	10	40	40	10	40	10	57	141	100	Confident
1085	MS3_01035.1				22.4022	100	29.9	18.8994					Single Protein		MS3_01035.1	4	4	3	3	4	4	10	10	100	Confident
257	MS3_07716.1				26.7965	64.1	15.81	18.8605					Single Protein		MS3_07716.1	2	3	3	2	3	2	8	9	100	Confident
262	MS3_05666.1				37.4732	91.79	12.16	18.5738					Single Protein		MS3_05666.1	3	4	4	3	4	3	12	14	100	Confident
390	MS3_05568.1				16.846	100	12.93	18.4756					Single Protein		MS3_05568.1	2	2	2	2	2	2	5	5	100	Doubtful
371	MS3_01444.1				82.0822	73.87	14.13	18.4481					Single Protein		MS3_01444.1	9	22	22	9	22	9	64	94	100	Confident
121	MS3_02183.1				140.071	60.05	15.49	18.418					Single Protein		MS3_02183.1	14	34	29	11	34	14	78	122	100	Confident
598	MS3_06596.1				61.0311	51.81	6.34	18.3598					Single Protein		MS3_06596.1	3	3	3	3	3	3	15	30	100	Confident
1034	MS3_01289.1				53.4141	83.99	16.84	18.1719			Deamidation of Q (Q200-{Q200 N205})	Deamidation of Q (1)	Single Protein		MS3_01289.1	7	9	9	7	9	7	26	34	100	Confident
437	MS3_00361.1				81.3749	95.68	14.96	17.8785					Single Protein		MS3_00361.1	9	21	21	9	21	9	49	66	100	Confident
417	MS3_04117.1				51.1783	69.72	4.59	17.8678					Single Protein		MS3_04117.1	2	5	5	2	5	2	10	20	100	Confident
1042	MS3_06680.1				53.242	68.97	22.43	17.7705					Single Protein		MS3_06680.1	8	9	9	8	9	8	24	27	100	Confident
789	MS3_11284.1				13.1116	100	21.74	17.7125					Single Protein		MS3_11284.1	2	3	3	2	3	2	4	9	100	Confident
854	MS3_02581.1				110.934	75.55	12.42	17.4167					Single Protein		MS3_02581.1	10	29	26	9	27	10	30	125	100	Confident
82	MS3_11376.1				31.537	80.07	14.95	17.3167					Single Protein		MS3_11376.1	3	3	3	3	3	3	10	10	100	Confident
36	MS3_00383.1				46.5851	81.8	9.22	17.0499	Deamidation of N(N17)	Deamidation of N(1)			Single Protein		MS3_00383.1	4	12	12	4	12	4	26	73	100	Confident
645	MS3_05634.1				98.6568	67.15	11.1	16.9685					Single Protein		MS3_05634.1	10	25	25	10	25	10	41	86	100	Confident
586	MS3_09330.1				45.9043	100	20.38	16.7476					Single Protein		MS3_09330.1	7	13	13	7	13	7	32	40	100	Confident
474	MS3_07856.1				19.3216	82.76	39.08	16.5842					Single Protein		MS3_07856.1	4	4	4	4	4	4	9	9	100	Confident
659	MS3_10572.1				56.4453	84.23	11.73	16.5174	Deamidation of N(N123)	Deamidation of N(1)			Single Protein		MS3_10572.1	6	16	15	6	15	6	26	38	100	Confident
476	MS3_00625.1				52.9454	75.21	15	16.4945					Single Protein		MS3_00625.1	5	9	9	5	9	5	21	26	100	Confident
954	MS3_10188.1				42.572	83.11	13.14	16.3569					Single Protein		MS3_10188.1	3	8	8	3	8	3	12	18	100	Confident
673	MS3_08268.1				26.7018	85.95	11.16	16.3216					Single Protein		MS3_08268.1	2	4	4	2	4	2	7	13	100	Confident
761	MS3_10931.1				40.1522	73.39	10.64	16.3182					Single Protein		MS3_10931.1	3	3	3	3	3	3	14	15	100	Confident
1002	MS3_08048.1				106.736	77.49	19.64	16.234					Single Protein		MS3_08048.1	13	29	29	13	29	13	64	111	100	Confident
426	MS3_00027.1				97.9401	93.13	24.41	16.229					Single Protein		MS3_00027.1	20	42	42	20	42	20	127	170	100	Confident
326	MS3_00353.1				23.1578	100	23.41	16.1819					Single Protein		MS3_00353.1	4	5	3	2	3	2	24	41	100	Confident
1072	MS3_07939.1				19.5227	72	10.86	16.1661					Single Protein		MS3_07939.1	2	4	4	2	4	2	4	6	100	Confident
151	MS3_04481.1				96.4109	64.24	8.34	16.1177			Deamidation of N (N629-{N621 N628 N629})	Deamidation of N (1)	Single Protein		MS3_04481.1	6	12	10	5	10	5	56	63	100	Confident
120	MS3_09524.1				17.7652	100	14.86	16.0569					Single Protein		MS3_09524.1	2	4	4	2	4	2	5	23	100	Doubtful
844	MS3_06075.1				31.3377	80.14	11.91	15.9327					Single Protein		MS3_06075.1	2	2	2	2	2	2	7	7	100	Confident
458	MS3_02928.1				56.1198	71.51	22.67	15.9285					Single Protein		MS3_02928.1	9	20	20	9	20	9	29	85	100	Confident
337	MS3_00593.1				34.1632	41.39	2.65	15.891	Oxidation of M(M1)	Oxidation of M(1)			Single Protein		MS3_00593.1	2	3	3	2	3	2	6	9	100	Confident
762	MS3_06601.1				16.2882	76.43	14.29	15.864					Single Protein		MS3_06601.1	2	2	2	2	2	2	3	3	100	Confident
788	MS3_06746.1				33.7698	87.75	18.21	15.5866					Single Protein		MS3_06746.1	4	5	5	4	5	4	11	11	100	Confident
984	MS3_07892.1				37.488	64.12	7.06	15.5729					Single Protein		MS3_07892.1	2	3	3	2	3	2	8	9	100	Confident
585	MS3_02398.1				69.7344	75.68	17.97	15.5334					Single Protein		MS3_02398.1	8	17	17	8	17	8	28	86	100	Confident
868	MS3_06922.1				22.015	58.79	16.08	15.3538	Oxidation of M(M192)	Oxidation of M(1)			Single Protein		MS3_06922.1	2	2	2	2	2	2	7	7	100	Confident
220	MS3_01378.1				56.0301	100	9.94	15.2644					Single Protein		MS3_01378.1	4	20	20	4	20	4	24	45	100	Confident
379	MS3_00950.1				58.951	73.31	3.87	15.2277					Single Protein		MS3_00950.1	2	4	4	2	4	2	10	12	100	Confident
786	MS3_08019.1				43.0655	84.9	8.59	15.067					Single Protein		MS3_08019.1	3	4	4	3	4	3	12	13	100	Confident
503	MS3_04595.1				86.5373	77.91	15.2	15.0306					Single Protein		MS3_04595.1	10	21	21	10	21	10	49	64	100	Confident
516	MS3_00613.1				37.7273	90.58	5.78	14.8099					Single Protein		MS3_00613.1	2	4	4	2	4	2	8	10	100	Confident
123	MS3_06531.1				79.123	80.08	15.15	14.6707					Single Protein		MS3_06531.1	8	16	16	8	16	8	32	49	100	Confident
871	MS3_06564.1				117.714	31.02	8.43	14.5824					Single Protein		MS3_06564.1	6	10	10	6	10	6	28	39	100	Confident
876	MS3_06551.1				62.0983	80	17.27	14.5409	Deamidation of N(N479); Oxidation of M(M473)	Deamidation of N(1); Oxidation of M(1)			Single Protein		MS3_06551.1	9	12	12	9	12	9	28	38	100	Confident
17	MS3_06669.1				46.897	85.65	20	14.5163					Single Protein		MS3_06669.1	6	13	13	6	13	6	22	31	100	Confident
510	MS3_09903.1				75.828	71.54	8.89	14.479					Single Protein		MS3_09903.1	6	13	5	2	13	6	30	43	100	Confident
395	MS3_01821.1				111.181	78.92	3.12	14.3806					Single Protein		MS3_01821.1	3	6	6	3	6	3	23	27	100	Confident
850	MS3_05832.1				83.9073	78.13	14.36	14.306					Single Protein		MS3_05832.1	9	25	25	9	25	9	43	64	100	Confident
600	MS3_07554.1				104.355	67.74	17.9	14.2747	Deamidation of N(N460)	Deamidation of N(1)			Single Protein		MS3_07554.1	13	18	18	13	18	13	66	96	100	Confident
767	MS3_06507.1				52.7706	82.43	21.13	14.0251					Single Protein		MS3_06507.1	6	9	9	6	9	6	27	31	100	Confident
587	MS3_10606.1				28.8432	54.28	11.52	13.9516					Single Protein		MS3_10606.1	2	2	2	2	2	2	4	5	100	Confident
629	MS3_04292.1				57.1627	46.8	9	13.7631					Single Protein		MS3_04292.1	4	6	6	4	6	4	14	17	100	Confident
816	MS3_02343.1				54.2087	87.24	13.79	13.7106					Single Protein		MS3_02343.1	5	13	13	5	13	5	18	32	100	Confident
717	MS3_05632.1				23.5726	57.28	14.56	13.6576					Single Protein		MS3_05632.1	2	5	5	2	5	2	5	15	100	Confident
628	MS3_09778.1				39.8376	82.62	11.68	13.6082					Related Proteins	MS3_10687.1	MS3_09778.1, MS3_10687.1	3	4	4	3	4	3	15	19	100	Confident
713	MS3_00583.1				14.6524	100	16	13.5795					Single Protein		MS3_00583.1	2	2	2	2	2	2	4	4	100	Confident
392	MS3_08954.1				50.5615	88.12	32.18	13.566					Single Protein		MS3_08954.1	9	15	15	9	15	9	28	38	100	Confident
625	MS3_02638.1				27.1688	100	14.53	13.5409					Single Protein		MS3_02638.1	3	3	3	3	3	3	9	9	100	Confident
901	MS3_09482.1				14.7469	79.53	22.83	13.3657					Single Protein		MS3_09482.1	2	2	2	2	2	2	3	3	100	Confident
181	MS3_00151.1				56.1284	72.09	13.25	13.3516					Single Protein		MS3_00151.1	5	7	7	5	7	5	19	24	100	Confident
99	MS3_02936.1				19.5197	68.54	16.29	13.3507					Single Protein		MS3_02936.1	2	2	2	2	2	2	5	5	100	Confident
956	MS3_01906.1				12.6702	100	20.19	13.0573					Single Protein		MS3_01906.1	2	3	3	2	3	2	3	4	100	Confident
1083	MS3_01288.1				89.8928	92.52	16.73	12.9689	Oxidation of M(M209, M243)	Oxidation of M(2)			Single Protein		MS3_01288.1	9	28	28	9	28	9	38	77	100	Confident
316	MS3_05520.1				33.074	81.94	25.08	12.868					Single Protein		MS3_05520.1	4	7	7	4	7	4	9	15	100	Confident
109	MS3_08566.1				67.234	85.69	7.84	12.8631					Single Protein		MS3_08566.1	5	8	7	5	7	5	16	20	100	Confident
833	MS3_00688.1				68.251	60.07	10.89	12.8294					Single Protein		MS3_00688.1	6	11	11	6	11	6	15	24	100	Confident
415	MS3_07831.1				41.4608	83.91	10.46	12.7225					Single Protein		MS3_07831.1	3	5	5	3	5	3	11	13	100	Confident
764	MS3_06244.1				30.032	68.16	8.61	12.7149					Single Protein		MS3_06244.1	2	4	4	2	4	2	6	9	100	Confident
385	MS3_02402.1				24.42	87.85	21.03	12.6912					Single Protein		MS3_02402.1	2	2	2	2	2	2	5	5	100	Confident
1030	MS3_00076.1				25.1659	71.11	13.78	12.6405					Single Protein		MS3_00076.1	2	3	3	2	3	2	4	5	100	Confident
836	MS3_01779.1				20.7854	100	28.33	12.5737					Single Protein		MS3_01779.1	3	3	3	3	3	3	6	6	100	Confident
950	MS3_07903.1				36.299	64.2	10.49	12.5132					Single Protein		MS3_07903.1	3	8	8	3	8	3	10	18	100	Confident
18	MS3_05589.1				58.154	63.83	11.8	12.3772					Single Protein		MS3_05589.1	4	4	4	4	4	4	15	15	100	Confident
847	MS3_07287.1				25.9715	74.15	17.37	12.264					Single Protein		MS3_07287.1	3	5	5	3	5	3	6	9	100	Confident
238	MS3_10252.1				52.63	68.1	18.53	12.1811	Oxidation of M(M440)	Oxidation of M(1)			Single Protein		MS3_10252.1	9	10	4	3	4	3	44	48	100	Confident
15	MS3_07590.1				47.8386	34.4	7.57	12.1681					Single Protein		MS3_07590.1	2	4	4	2	4	2	8	10	100	Confident
932	MS3_04395.1				43.6388	84.1	12.05	11.8278					Single Protein		MS3_04395.1	3	5	5	3	5	3	9	11	100	Confident
997	MS3_04630.1				52.0631	61.16	8.15	11.8058					Single Protein		MS3_04630.1	3	3	3	3	3	3	12	12	100	Confident
608	MS3_09478.1				48.2599	68.31	12.13	11.663					Single Protein		MS3_09478.1	3	7	7	3	7	3	9	15	100	Confident
453	MS3_07007.1				79.239	95.96	12.7	11.5951	Deamidation of N(N509)	Deamidation of N(1)			Single Protein		MS3_07007.1	8	20	20	8	20	8	24	43	100	Confident
809	MS3_01527.1				20.6034	100	18.75	11.5735					Single Protein		MS3_01527.1	3	5	5	3	5	3	6	8	100	Confident
678	MS3_05381.1				126.842	82.76	7.1	11.2911					Single Protein		MS3_05381.1	7	32	32	7	32	7	28	161	100	Confident
865	MS3_07763.1				45.3063	86.54	10.34	11.1591					Single Protein		MS3_07763.1	4	6	6	4	6	4	12	15	100	Confident
593	MS3_10619.1				73.3792	77.09	12.44	11.1367					Single Protein		MS3_10619.1	7	27	27	7	27	7	34	61	100	Confident
208	MS3_07384.1				37.6813	100	6.55	11.1142					Single Protein		MS3_07384.1	2	11	11	2	11	2	7	24	100	Confident
246	MS3_01627.1				54.3441	92.76	21.93	11.0539					Single Protein		MS3_01627.1	9	9	9	9	9	9	19	19	100	Confident
1009	MS3_00312.1				98.1658	93.23	15.52	11.0157					Single Protein		MS3_00312.1	10	33	33	10	33	10	38	127	100	Confident
1074	MS3_00207.1				66.9343	63.31	3.8	10.9734					Single Protein		MS3_00207.1	2	7	7	2	7	2	9	18	100	Confident
617	MS3_06248.1				75.5191	72.33	4.81	10.6719					Single Protein		MS3_06248.1	3	12	12	3	12	3	11	27	100	Confident
832	MS3_04526.1				25.1906	84.51	11.95	10.6646					Single Protein		MS3_04526.1	2	3	3	2	3	2	4	6	100	Confident
569	MS3_03211.1				75.9535	43.79	3.85	10.6392					Single Protein		MS3_03211.1	2	7	7	2	7	2	8	23	100	Confident
776	MS3_00585.1				18.1072	49.38	8.13	10.609					Single Protein		MS3_00585.1	2	3	3	2	3	2	3	5	100	Confident
1041	MS3_02843.1				146.06	68.38	5.93	10.6039					Single Protein		MS3_02843.1	7	34	34	7	34	7	26	118	100	Confident
372	MS3_05531.1				47.961	58.53	23.46	10.556					Single Protein		MS3_05531.1	6	10	9	6	9	6	17	24	100	Confident
440	MS3_05209.1				26.9853	64.73	14.52	10.5124					Single Protein		MS3_05209.1	3	3	3	3	3	3	6	6	100	Confident
265	MS3_02641.1				22.3704	85.57	11.86	10.4997					Single Protein		MS3_02641.1	2	7	7	2	7	2	4	11	100	Confident
356	MS3_04680.1				24.8094	100	20.89	10.4361					Single Protein		MS3_04680.1	4	5	4	3	4	3	13	30	100	Confident
214	MS3_03427.1				40.0341	91.93	15.56	10.4358					Single Protein		MS3_03427.1	3	3	3	3	3	3	7	8	100	Confident
71	MS3_01223.1				122.701	66.51	12.72	10.3983					Single Protein		MS3_01223.1	11	14	14	11	14	11	34	46	100	Confident
883	MS3_02728.1				57.5862	87.97	20.51	10.3633					Single Protein		MS3_02728.1	6	9	9	6	9	6	16	21	100	Confident
156	MS3_01744.1				268.172	69.67	19.69	10.2806			Deamidation of N (N386-{N386 Q387})	Deamidation of N (1)	Single Protein		MS3_01744.1	36	77	77	36	77	36	179	252	100	Confident
226	MS3_06209.1				74.5817	85.41	5.32	10.2675	Deamidation of N(N396, N399)	Deamidation of N(2)			Single Protein		MS3_06209.1	5	16	16	5	16	5	20	75	100	Confident
338	MS3_04598.1				60.3756	57.48	9.12	10.2575					Single Protein		MS3_04598.1	5	7	6	4	6	4	15	17	100	Confident
333	MS3_04585.1				155.828	47.51	5.69	10.255					Single Protein		MS3_04585.1	6	14	12	6	12	6	22	34	100	Confident
1022	MS3_01898.1				60.4389	63.12	5.87	10.2358					Single Protein		MS3_01898.1	2	7	7	2	7	2	8	48	100	Confident
603	MS3_08399.1				55.628	77.84	6.27	10.1659					Single Protein		MS3_08399.1	3	7	7	3	7	3	9	25	100	Confident
86	MS3_06928.1				59.1522	76.6	15.36	10.0646					Single Protein		MS3_06928.1	7	23	22	7	22	7	25	57	100	Confident
921	MS3_03208.1				189.143	70.99	18.13	10.0015	Deamidation of N(N942)	Deamidation of N(1)	Deamidation of N (N1448-{N1448 Q1450 N1452 Q1456})	Deamidation of N (1)	Single Protein		MS3_03208.1	25	58	52	21	58	25	140	283	100	Confident
500	MS3_09546.1				35.0575	68.23	6.02	9.98496					Single Protein		MS3_09546.1	2	5	5	2	5	2	4	10	100	Confident
507	MS3_07988.1				38.4468	100	12.04	9.95414					Single Protein		MS3_07988.1	4	8	8	4	8	4	10	18	100	Confident
1008	MS3_01309.1				62.0211	88.6	7.54	9.78225					Single Protein		MS3_01309.1	4	9	9	4	9	4	13	24	100	Confident
189	MS3_08925.1				56.0945	77.54	15.43	9.75345					Single Protein		MS3_08925.1	7	9	9	7	9	7	16	18	100	Confident
490	MS3_10248.1				294.485	71.39	27.36	9.69311	Oxidation of M(M506, M672, M2215)	Oxidation of M(3)	Deamidation of Q (Q531-{Q524 Q529 Q531}, Q697-{Q690 Q695 Q697}, Q943-{N939 Q943 Q945 N950 Q953 Q956})	Deamidation of Q (3)	Single Protein		MS3_10248.1	44	107	107	44	107	44	278	465	100	Confident
287	MS3_04932.1				79.5952	75	7.75	9.51282					Single Protein		MS3_04932.1	4	11	11	4	11	4	16	26	100	Confident
37	MS3_06401.1				126.587	78.21	14.01	9.50525					Single Protein		MS3_06401.1	12	36	36	12	36	12	53	354	100	Confident
354	MS3_11226.1				44.3267	86.26	6.62	9.50223					Single Protein		MS3_11226.1	2	4	4	2	4	2	9	12	100	Confident
651	MS3_06101.1				22.4164	60.1	12.44	9.49619					Single Protein		MS3_06101.1	2	2	2	2	2	2	3	3	100	Confident
175	MS3_03054.1				55.2868	83.27	4.78	9.46781					Single Protein		MS3_03054.1	2	4	4	2	4	2	10	12	100	Confident
971	MS3_09614.1				63.8096	51.62	7.19	9.45566					Single Protein		MS3_09614.1	3	3	3	3	3	3	7	7	100	Confident
667	MS3_05024.1				61.0687	84.6	6.12	9.44774					Single Protein		MS3_05024.1	3	12	12	3	12	3	12	49	100	Confident
282	MS3_02427.1				50.7857	67.11	4.92	9.40123					Single Protein		MS3_02427.1	2	5	5	2	5	2	6	12	100	Confident
657	MS3_02001.1				20.2055	86.26	12.09	9.32661					Single Protein		MS3_02001.1	2	3	3	2	3	2	4	4	100	Confident
493	MS3_08717.1				17.3088	100	18.24	9.17537					Single Protein		MS3_08717.1	2	3	3	2	3	2	3	4	100	Confident
502	MS3_02927.1				253.311	46.27	5.53	9.12439					Single Protein		MS3_02927.1	9	35	35	9	35	9	36	101	100	Confident
710	MS3_11058.1				80.9814	61.21	7.19	8.88864					Single Protein		MS3_11058.1	4	9	9	4	9	4	11	16	100	Confident
76	MS3_09549.1				74.9849	82.71	6.62	8.84728					Single Protein		MS3_09549.1	4	11	10	3	10	3	17	28	100	Confident
568	MS3_06834.1				42.4006	75.2	6.86	8.761	Oxidation of M(M141)	Oxidation of M(1)			Single Protein		MS3_06834.1	2	3	2	2	3	2	7	10	100	Confident
811	MS3_06660.1				40.6576	77.03	15.97	8.71703					Single Protein		MS3_06660.1	4	7	7	4	7	4	11	15	100	Confident
332	MS3_06989.1				85.0327	85.66	2.82	8.67866					Related Proteins	MS3_06991.1	MS3_06989.1, MS3_06991.1	2	14	14	2	14	2	10	34	100	Confident
147	MS3_10157.1				34.7427	77.36	10.69	8.64153					Single Protein		MS3_10157.1	2	6	6	2	6	2	4	8	100	Confident
179	MS3_03534.1				57.5389	85.02	5.64	8.58629					Single Protein		MS3_03534.1	2	7	7	2	7	2	9	15	100	Confident
414	MS3_02079.1				90.4485	75.12	13.74	8.5538					Single Protein		MS3_02079.1	8	11	11	8	11	8	21	29	100	Confident
6	MS3_03403.1				35.9833	64.78	9.75	8.5406					Single Protein		MS3_03403.1	2	4	4	2	4	2	6	10	100	Confident
235	MS3_00394.1				137.049	72.86	8.56	8.40989					Single Protein		MS3_00394.1	7	22	22	7	22	7	38	78	100	Confident
452	MS3_07976.1				60.387	67.29	13.72	8.32751					Single Protein		MS3_07976.1	4	6	6	4	6	4	9	11	100	Confident
856	MS3_05222.1				66.793	74.16	9.8	8.29378					Single Protein		MS3_05222.1	5	9	9	5	9	5	13	19	100	Confident
260	MS3_02787.1				36.4578	63.98	7.14	8.24002					Single Protein		MS3_02787.1	2	7	7	2	7	2	4	9	100	Confident
787	MS3_10550.1				35.9247	81.11	9.29	8.19455					Single Protein		MS3_10550.1	2	3	3	2	3	2	4	5	100	Confident
743	MS3_07718.1				19.8731	68.45	13.69	8.08306					Single Protein		MS3_07718.1	2	2	2	2	2	2	3	3	100	Confident
154	MS3_09658.1				80.5319	92.55	11.86	8.02509					Single Protein		MS3_09658.1	7	11	11	7	11	7	19	27	100	Confident
93	MS3_03511.1				30.6819	86.02	15.05	8.01571					Single Protein		MS3_03511.1	3	4	4	3	4	3	4	6	100	Confident
685	MS3_03127.1				53.9378	86.35	14.86	7.9734					Single Protein		MS3_03127.1	5	9	9	5	9	5	13	19	100	Confident
42	MS3_01139.1				77.8652	80.42	6.9	7.70522					Single Protein		MS3_01139.1	5	16	15	4	15	4	21	47	100	Confident
249	MS3_09502.1				116.545	74.65	6.67	7.69508					Single Protein		MS3_09502.1	6	22	12	4	20	6	24	104	100	Confident
1003	MS3_02590.1				63.8356	85.96	10.27	7.654					Single Protein		MS3_02590.1	4	10	10	4	10	4	10	18	100	Confident
1049	MS3_09128.1				49.5678	93.79	15.08	7.65292					Single Protein		MS3_09128.1	4	8	8	4	8	4	9	17	100	Confident
536	MS3_06274.1				63.3875	57.59	5.48	7.64614					Single Protein		MS3_06274.1	2	5	5	2	5	2	6	12	100	Confident
485	MS3_08227.1				124.904	72.61	3.37	7.63914					Single Protein		MS3_08227.1	3	14	14	3	14	3	14	34	100	Confident
165	MS3_02346.1				36.8112	87.58	12.73	7.62445					Single Protein		MS3_02346.1	3	4	3	3	3	3	5	7	100	Confident
110	MS3_09287.1				19.2785	46.59	14.77	7.54419			Deamidation of Q (Q72-{Q72 N74 Q80 Q83 Q84 N87 N89})	Deamidation of Q (1)	Single Protein		MS3_09287.1	2	3	3	2	3	2	2	3	100	Confident
545	MS3_01318.1				90.0017	92.28	10.92	7.50827					Single Protein		MS3_01318.1	7	39	39	7	39	7	25	253	100	Confident
983	MS3_01642.1				125.611	66.4	10.22	7.49078	Oxidation of M(M1123)	Oxidation of M(1)			Single Protein		MS3_01642.1	8	21	21	8	21	8	26	47	100	Confident
928	MS3_09350.1				58.7006	65.8	9.98	7.45846					Single Protein		MS3_09350.1	3	4	4	3	4	3	8	9	100	Confident
900	MS3_09362.1				46.2291	80.39	7.99	7.39806					Single Protein		MS3_09362.1	2	3	3	2	3	2	5	6	100	Confident
873	MS3_06431.1				40.4359	75.91	7	7.38019	Oxidation of M(M238)	Oxidation of M(1)			Single Protein		MS3_06431.1	2	3	3	2	3	2	5	6	100	Confident
22	MS3_05323.1				86.2183	92.85	11.96	7.31575					Single Protein		MS3_05323.1	7	14	14	7	14	7	21	34	100	Confident
301	MS3_11098.1				26.6925	100	8.94	7.22316					Single Protein		MS3_11098.1	2	4	4	2	4	2	4	6	100	Doubtful
406	MS3_10616.1				71.9842	62.72	6.48	7.19166					Single Protein		MS3_10616.1	3	5	5	3	5	3	11	14	100	Confident
433	MS3_07724.1				41.351	91.99	11.33	7.18991					Single Protein		MS3_07724.1	3	6	6	3	6	3	5	11	100	Confident
935	MS3_07401.1				78.6759	74.61	4.45	7.1504					Single Protein		MS3_07401.1	3	7	6	2	7	3	11	15	100	Confident
8	MS3_08696.1				66.0731	78.28	8.25	7.11572					Single Protein		MS3_08696.1	3	7	7	3	7	3	10	15	100	Confident
688	MS3_09454.1				99.0776	70.8	2.41	7.08322					Single Protein		MS3_09454.1	2	8	8	2	8	2	9	19	100	Confident
135	MS3_07240.1				62.8891	73.91	4.35	7.04009					Single Protein		MS3_07240.1	2	8	8	2	8	2	5	1039	100	Confident
942	MS3_09961.1				114.011	80.6	11.7	7.02629					Single Protein		MS3_09961.1	10	22	22	10	22	10	35	49	100	Confident
1057	MS3_00078.1				24.8219	61.23	12.78	6.99977					Single Protein		MS3_00078.1	2	3	3	2	3	2	3	6	100	Confident
1018	MS3_08395.1				117.608	76.38	12.48	6.98624					Single Protein		MS3_08395.1	11	30	30	11	30	11	33	65	100	Confident
843	MS3_06828.1				52.6771	93.07	13.03	6.9737	Deamidation of Q(Q368)	Deamidation of Q(1)			Single Protein		MS3_06828.1	6	13	13	6	13	6	17	70	100	Confident
1039	MS3_10520.1				71.8645	66.14	11.76	6.90294					Single Protein		MS3_10520.1	6	12	9	4	12	6	16	23	100	Confident
225	MS3_11221.1				26.9244	83.12	10.97	6.89317					Single Protein		MS3_11221.1	2	5	5	2	5	2	3	17	100	Confident
709	MS3_06736.1				20.0525	100	25.97	6.8773					Single Protein		MS3_06736.1	3	3	3	3	3	3	3	3	100	Confident
62	MS3_09870.1				110.511	81.05	4.92	6.86228					Single Protein		MS3_09870.1	4	12	12	4	12	4	15	26	100	Confident
1082	MS3_11409.1				16.7264	100	16	6.78977					Single Protein		MS3_11409.1	2	2	2	2	2	2	2	2	100	Confident
381	MS3_06398.1				91.6822	89.63	9.88	6.77147					Single Protein		MS3_06398.1	6	16	16	6	16	6	18	33	100	Confident
989	MS3_01543.1				52.3334	76.12	17.48	6.71743					Related Proteins	MS3_01544.1	MS3_01543.1, MS3_01544.1	4	5	5	4	5	4	7	8	100	Confident
31	MS3_04220.1				67.0599	73.4	6.57	6.68376					Single Protein		MS3_04220.1	3	12	12	3	12	3	11	42	100	Confident
879	MS3_00891.1				47.1054	92.93	9.51	6.62417	Deamidation of Q(Q92)	Deamidation of Q(1)			Single Protein		MS3_00891.1	3	12	9	2	11	2	9	77	100	Doubtful
505	MS3_07125.1				21.9654	100	13.83	6.62123					Single Protein		MS3_07125.1	3	4	4	3	4	3	3	5	100	Doubtful
428	MS3_02818.1				43.5035	92.84	12.47	6.60367					Single Protein		MS3_02818.1	3	4	4	3	4	3	7	8	100	Confident
305	MS3_03841.1				52.3865	70.43	5.32	6.5647					Single Protein		MS3_03841.1	2	5	5	2	5	2	6	16	100	Confident
654	MS3_03954.1				62.8017	58.93	3.93	6.54436					Single Protein		MS3_03954.1	2	5	5	2	5	2	7	16	100	Confident
864	MS3_02964.1				106.486	49.69	8.98	6.40968					Single Protein		MS3_02964.1	5	5	5	5	5	5	12	12	100	Confident
815	MS3_04049.1				63.8642	79.65	4.78	6.35747					Single Protein		MS3_04049.1	2	6	6	2	6	2	6	10	100	Confident
1025	MS3_02460.1				19.4831	83.13	11.45	6.13534					Single Protein		MS3_02460.1	2	2	2	2	2	2	2	2	100	Confident
533	MS3_01823.1				71.9591	78.16	4.68	6.07981					Single Protein		MS3_01823.1	3	12	12	3	12	3	7	24	100	Confident
807	MS3_06553.1				102.641	80.13	9.07	5.85641	Deamidation of Q(Q13)	Deamidation of Q(1)			Single Protein		MS3_06553.1	6	10	10	6	10	6	13	21	100	Confident
136	MS3_04014.1				42.4891	76.8	7.2	5.73359					Single Protein		MS3_04014.1	3	6	6	3	6	3	6	24	100	Confident
302	MS3_00592.1				259.245	64.94	6.34	5.63414	Deamidation of N(N613, N1033)	Deamidation of N(2)			Single Protein		MS3_00592.1	12	36	34	12	34	12	38	89	100	Confident
781	MS3_06149.1				37.6013	75.52	13.73	5.60212					Single Protein		MS3_06149.1	3	7	7	3	7	3	5	9	100	Confident
61	MS3_02687.1				45.1905	72.89	6.32	5.56539					Single Protein		MS3_02687.1	2	7	7	2	7	2	4	10	100	Confident
254	MS3_05283.1				44.3042	75.56	6.67	5.5472					Single Protein		MS3_05283.1	2	5	5	2	5	2	3	6	100	Confident
1070	MS3_04534.1				76.0866	81.93	8.74	5.527					Single Protein		MS3_04534.1	4	14	14	4	14	4	10	44	100	Confident
827	MS3_04646.1				60.2878	75.05	16.39	5.46048					Single Protein		MS3_04646.1	6	8	8	6	8	6	10	15	100	Confident
422	MS3_07101.1				46.2362	70.22	5.71	5.45802					Single Protein		MS3_07101.1	2	2	2	2	2	2	3	3	100	Confident
403	MS3_03768.1				59.6852	75.86	9.7	5.37087					Single Protein		MS3_03768.1	4	7	7	4	7	4	8	19	100	Confident
652	MS3_01400.1				81.4598	73.22	5.79	5.36399					Single Protein		MS3_01400.1	3	13	13	3	13	3	8	21	100	Confident
146	MS3_00546.1				32.9389	66.67	9.12	5.36035	Deamidation of Q(Q6)	Deamidation of Q(1)	Deamidation of N (N3-{N2 N3})	Deamidation of N (1)	Single Protein		MS3_00546.1	2	2	2	2	2	2	3	25	100	Doubtful
734	MS3_08364.1				160.229	65.97	5.56	5.09782					Single Protein		MS3_08364.1	6	32	32	6	32	6	15	77	100	Confident
779	MS3_05046.1				95.9232	77.99	4.62	5.03646					Single Protein		MS3_05046.1	3	11	11	3	11	3	7	165	100	Confident
953	MS3_08776.1				33.1428	86.3	14.04	4.93965					Single Protein		MS3_08776.1	3	8	7	3	7	3	3	8	100	Confident
672	MS3_04449.1				49.0597	55.51	4.04	4.92013					Single Protein		MS3_04449.1	2	3	3	2	3	2	3	5	100	Confident
308	MS3_01335.1				173.354	80.8	5.33	4.8679					Single Protein		MS3_01335.1	5	39	39	5	39	5	19	99	100	Confident
680	MS3_03091.1				35.6676	71.03	11.21	4.74809					Single Protein		MS3_03091.1	2	3	3	2	3	2	3	7	100	Confident
988	MS3_08404.1				45.2202	85.68	4.77	4.63782					Single Protein		MS3_08404.1	2	5	5	2	5	2	4	17	100	Confident
622	MS3_10320.1				82.0401	87.52	7.21	4.61217					Single Protein		MS3_10320.1	4	12	12	4	12	4	12	24	100	Confident
1061	MS3_01897.1				63.8276	81.95	9.03	4.60547					Single Protein		MS3_01897.1	3	6	6	3	6	3	7	11	100	Confident
937	MS3_04405.1				157.984	70.8	4.11	4.53083					Single Protein		MS3_04405.1	3	11	11	3	11	3	11	21	100	Confident
714	MS3_08230.1				117.848	82.7	9.38	4.48977					Single Protein		MS3_08230.1	7	25	25	7	25	7	18	56	100	Confident
780	MS3_04827.1				49.4354	71.97	7.84	4.40894					Single Protein		MS3_04827.1	3	4	3	2	3	2	5	7	100	Confident
640	MS3_05754.1				41.6201	90.93	6.8	4.23039					Single Protein		MS3_05754.1	2	3	3	2	3	2	3	9	100	Confident
757	MS3_01890.1				93.5768	55.49	3.29	4.19862					Single Protein		MS3_01890.1	2	5	5	2	5	2	5	8	100	Confident
116	MS3_05575.1				127.574	53.07	6.22	4.11062					Single Protein		MS3_05575.1	4	8	8	4	8	4	10	17	100	Confident
311	MS3_03494.1				35.4635	61.8	10.56	4.00971					Single Protein		MS3_03494.1	2	4	4	2	4	2	2	4	100	Confident
848	MS3_03326.1				77.1515	78.66	6.1	3.9806					Single Protein		MS3_03326.1	3	7	7	3	7	3	6	10	100	Confident
197	MS3_01601.1				81.4361	78.87	5.39	3.90803					Single Protein		MS3_01601.1	3	7	7	3	7	3	6	25	100	Confident
618	MS3_09608.1				39.1388	72.33	8.22	3.85783					Single Protein		MS3_09608.1	2	2	2	2	2	2	2	2	100	Confident
448	MS3_10378.1				51.6767	100	6.01	3.7805					Single Protein		MS3_10378.1	2	6	6	2	6	2	3	10	100	Confident
457	MS3_04581.1				78.595	68.66	4.61	3.74772	Deamidation of N(N614)	Deamidation of N(1)			Single Protein		MS3_04581.1	4	10	10	4	10	4	6	27	100	Confident
478	MS3_00505.1				70.2283	54.6	4.29	3.65042					Single Protein		MS3_00505.1	2	3	3	2	3	2	3	8	100	Confident
830	MS3_04130.1				97.1571	70.25	2.43	3.57357					Single Protein		MS3_04130.1	2	9	8	2	8	2	5	47	100	Confident
825	MS3_11383.1				32.8635	90.88	9.82	3.57357					Single Protein		MS3_11383.1	2	3	3	2	3	2	2	3	100	Confident
382	MS3_07009.1				196.435	74.61	1.27	3.55253					Single Protein		MS3_07009.1	2	22	22	2	22	2	9	51	100	Confident
1013	MS3_06466.1				72.2202	77.5	5.39	3.54939					Single Protein		MS3_06466.1	3	3	3	3	3	3	4	8	100	Confident
739	MS3_04920.1				56.7477	88.82	4.88	3.45009					Single Protein		MS3_04920.1	2	3	3	2	3	2	3	4	100	Confident
398	MS3_06500.1				43.9177	74.06	5.24	3.42918					Single Protein		MS3_06500.1	2	7	7	2	7	2	2	13	100	Confident
517	MS3_09640.1				234.628	89.6	5.97	3.41299					Single Protein		MS3_09640.1	10	74	70	10	74	10	29	129	100	Confident
24	MS3_02062.1				46.0263	93.52	4.99	3.38642					Single Protein		MS3_02062.1	2	3	3	2	3	2	3	13	100	Confident
284	MS3_00485.1				70.7007	78.39	4.35	3.32181			Deamidation of N (N514-{N514 N516 N517})	Deamidation of N (1)	Single Protein		MS3_00485.1	2	4	4	2	4	2	3	7	100	Confident
430	MS3_04464.1				94.5528	64.13	7.97	3.31288	Deamidation of Q(Q8); Oxidation of M(M5)	Deamidation of Q(1); Oxidation of M(1)			Single Protein		MS3_04464.1	6	13	13	6	13	6	12	72	100	Confident
168	MS3_02969.1				118.628	72.08	6.32	3.22585					Single Protein		MS3_02969.1	4	9	9	4	9	4	8	14	100	Confident
413	MS3_10379.1				147.161	51.1	6.63	3.14778					Single Protein		MS3_10379.1	7	15	15	7	15	7	14	28	100	Confident
12	MS3_06059.1				64.6499	77	6.62	3.14341					Single Protein		MS3_06059.1	3	7	7	3	7	3	4	13	100	Confident
368	MS3_03470.1				141.363	65.28	2.23	3.10745					Single Protein		MS3_03470.1	2	7	2	2	7	2	5	11	100	Confident
772	MS3_05669.1				62.4454	70.43	5.91	2.96497					Single Protein		MS3_05669.1	2	5	5	2	5	2	3	6	100	Confident
321	MS3_05317.1				266.058	92.21	10.27	2.91039					Single Protein		MS3_05317.1	19	82	82	19	82	19	41	168	100	Confident
884	MS3_05868.1				128.373	54.96	3.74	2.88751	Oxidation of M(M765)	Oxidation of M(1)			Single Protein		MS3_05868.1	3	6	6	3	6	3	6	9	100	Confident
658	MS3_02517.1				113.464	69.02	3.63	2.76382					Single Protein		MS3_02517.1	3	15	15	3	15	3	6	45	100	Confident
365	MS3_00724.1				126.789	63.06	6.39	2.732					Single Protein		MS3_00724.1	5	10	10	5	10	5	6	20	100	Confident
584	MS3_01424.1				81.859	41.86	2.49	2.70869					Single Protein		MS3_01424.1	2	3	3	2	3	2	2	5	100	Confident
343	MS3_05939.1				49.3323	69.35	6.68	2.65226					Single Protein		MS3_05939.1	2	5	5	2	5	2	2	6	100	Confident
1073	MS3_00794.1				179.509	70.65	2.27	2.617					Single Protein		MS3_00794.1	3	5	5	3	5	3	7	9	100	Confident
362	MS3_01217.1				259.588	39.55	2.13	2.61628					Single Protein		MS3_01217.1	4	15	14	3	15	4	9	20	100	Confident
477	MS3_04487.1				80.3401	82.76	4	2.58363					Single Protein		MS3_04487.1	2	20	20	2	20	2	4	48	100	Confident
307	MS3_08008.1				48.8708	73.19	5.36	2.5784					Single Protein		MS3_08008.1	2	2	2	2	2	2	2	2	100	Confident
744	MS3_09456.1				235.192	58.01	4.08	2.5095					Single Protein		MS3_09456.1	8	42	42	8	42	8	16	142	100	Confident
194	MS3_06795.1				57.9433	77.09	4.47	2.41343					Single Protein		MS3_06795.1	2	8	8	2	8	2	2	9	100	Confident
1054	MS3_05505.1				270.591	83.68	7.26	2.38627					Single Protein		MS3_05505.1	13	74	74	13	74	13	41	200	100	Confident
59	MS3_01712.1				108.179	66.32	2.31	2.30318					Single Protein		MS3_01712.1	2	21	21	2	21	2	4	52	100	Confident
588	MS3_01901.1				232.304	80.87	1.48	2.27375					Single Protein		MS3_01901.1	2	27	27	2	27	2	8	51	100	Confident
92	MS3_08339.1				166.914	58.13	1.83	2.26974					Single Protein		MS3_08339.1	2	17	17	2	17	2	5	27	100	Confident
95	MS3_00385.1				121.657	76.07	2.69	2.2683					Single Protein		MS3_00385.1	2	9	9	2	9	2	5	20	100	Confident
320	MS3_00869.1				108.782	48.59	10.05	2.10536					Single Protein		MS3_00869.1	3	4	4	3	4	3	8	8	100	Confident
1045	MS3_01023.1				133.321	78.58	2.67	2.09561					Single Protein		MS3_01023.1	3	18	18	3	18	3	6	29	100	Confident
152	MS3_00520.1				58.5595	83.24	4.19	2.07005					Single Protein		MS3_00520.1	2	5	5	2	5	2	2	12	100	Confident
292	MS3_07955.1				97.7705	50.72	2.34	1.70312					Single Protein		MS3_07955.1	2	5	5	2	5	2	2	11	100	Confident
805	MS3_02766.1				124.448	71.08	1.81	1.57353	Deamidation of N(N73)	Deamidation of N(1)			Single Protein		MS3_02766.1	2	7	7	2	7	2	3	15	100	Doubtful
499	MS3_09413.1				181.053	50.96	1.54	1.54594					Single Protein		MS3_09413.1	2	3	3	2	3	2	3	4	100	Confident
68	MS3_05574.1				258.045	85.47	3.42	1.50151					Single Protein		MS3_05574.1	6	39	39	6	39	6	13	55	100	Confident
609	MS3_03713.1				84.766	85.51	3.52	1.43446					Single Protein		MS3_03713.1	2	11	11	2	11	2	3	14	100	Confident
535	MS3_08695.1				153.707	76.97	1.77	1.39478					Single Protein		MS3_08695.1	2	13	13	2	13	2	3	18	100	Confident
128	MS3_06891.1				421.946	73.27	0.4	1.35977	Deamidation of N(N3681)	Deamidation of N(1)			Single Protein		MS3_06891.1	2	58	30	2	58	2	12	106	100	Confident
377	MS3_05677.1				40.3536	78.83	22.28	1.28557					Single Protein		MS3_05677.1	4	8	8	4	8	4	21	30	100	Confident
107	MS3_01222.1				135.865	62.77	2.39	1.20814					Single Protein		MS3_01222.1	2	14	14	2	14	2	2	31	100	Confident
501	MS3_06750.1				346.89	66.1	3.01	1.19096					Single Protein		MS3_06750.1	6	55	55	6	55	6	11	161	100	Confident
919	MS3_02464.1				114.648	75.41	2.92	1.18564					Single Protein		MS3_02464.1	2	9	9	2	9	2	3	55	100	Confident
902	MS3_06671.1				118.342	82.93	2.62	1.06201					Single Protein		MS3_06671.1	2	6	6	2	6	2	3	8	100	Confident
205	MS3_05570.1				254.218	88.27	1.67	1.03962					Single Protein		MS3_05570.1	3	64	64	3	64	3	7	160	100	Confident
150	MS3_09262.1				236.899	70.43	2.01	1.01834					Single Protein		MS3_09262.1	3	37	37	3	37	3	5	223	100	Confident
961	MS3_07546.1				176.079	75.1	1.33	1.00589					Single Protein		MS3_07546.1	2	17	17	2	17	2	3	170	100	Confident
166	MS3_01757.1				157.291	82.49	2.35	0.940886					Single Protein		MS3_01757.1	3	25	25	3	25	3	5	69	100	Confident
561	MS3_02636.1				393.76	76.29	2.91	0.882364					Single Protein		MS3_02636.1	7	63	63	7	63	7	12	140	100	Confident
397	MS3_07712.1				190.362	60.94	1.86	0.801311					Single Protein		MS3_07712.1	2	7	7	2	7	2	2	8	100	Confident
